1 **Structural distortions induced by Kinase Inhibiting RNase Attenuator**  
2 **(KIRA) compounds prevent the formation of face-to-face dimers of**  
3 **Inositol Requiring Enzyme 1 $\alpha$ .**

4

5 **Short title: KIRA compounds disrupt IRE1 face-to-face dimer formation.**

6

7 Antonio Carlesso<sup>1</sup>, Chetan Chintha<sup>2</sup>, Adrienne M. Gorman<sup>2</sup>, Afshin Samali<sup>2</sup> and Leif A.  
8 Eriksson<sup>1\*</sup>

9 <sup>1</sup>Department of Chemistry and Molecular Biology, University of Gothenburg, 405 30 Göteborg,  
10 Sweden

11 <sup>2</sup>Apoptosis Research Centre, National University of Ireland Galway, Galway, Ireland.

12

13

14 ORCID ID:

15 A.C.: 0000-0002-8318-7784

16 C.C.: 0000-0002-0105-8066

17 A.M.G.: 0000-0002-6068-0058

18 A.S.: 0000-0002-8610-8375

19 L.A.E.: 0000-0001-5654-3109

20

21 Correspondence

22 \*Leif A. Eriksson, Department of Chemistry and Molecular Biology,

23 University of Gothenburg, 405 30 Göteborg, Sweden.

24 Email: leif.eriksson@chem.gu.se

25 Phone: +46 317869117

26

27

28

29

30

31

32 **Abstract**

33 Inositol-Requiring Enzyme 1 $\alpha$  (IRE1 $\alpha$ ) is a transmembrane dual kinase/ribonuclease protein  
34 involved in propagation of the unfolded protein response (UPR). IRE1 $\alpha$  is currently explored  
35 as a potential drug target due to growing evidence of its role in variety of disease conditions.  
36 Upon activation, IRE1 cleaves X-box Binding Protein 1 (XBP1) mRNA through its RNase domain.  
37 Small molecules targeting the kinase site are known to either increase or decrease RNase  
38 activity, but the allosteric relationship between the kinase and RNase domains of IRE1 $\alpha$  is  
39 poorly understood. Subsets of IRE1 kinase inhibitors (known as “KIRA” compounds) bind to  
40 the ATP-binding site and allosterically impede the RNase activity. KIRA compounds are able to  
41 regulate the RNase activity by stabilizing monomeric form of IRE1 $\alpha$ .

42 In the present work, computational analysis, protein-protein and protein-ligand docking  
43 studies, and molecular dynamics simulations were applied to different IRE1 dimer systems to  
44 provide structural insights into the perturbation of IRE1 dimers by small molecules kinase  
45 inhibitors that regulate the RNase activity. By analyzing structural deviations, energetic  
46 components and number of hydrogen bonds in the interface region, we propose that the KIRA  
47 inhibitors act at an early stage of IRE1 activation by interfering with IRE1 face-to-face dimer  
48 formation, thus disabling the activation of the RNase domain. The work sheds light on the  
49 mechanism of action of KIRA compounds and may assist in development of further  
50 compounds in e.g. cancer therapeutics. The work also provides information on the sequence  
51 of events and protein-protein interactions initiating the unfolded protein response.

52

53

54 **Keywords:** IRE1, KIRA, dimer formation, unfolded protein response, protein-protein docking,  
55 molecular dynamics simulations

56

57

58 **Non-technical Summary**

59 The unfolded protein response is a protective feedback mechanism whereby cells regulate  
60 high levels of misfolded proteins in the endoplasmic reticulum. Due to its significance in cell  
61 survival, the UPR has become an interesting target in cancer therapy. A key pathway of the  
62 UPR is initiated by the activation of inositol requiring enzyme 1 $\alpha$  (IRE1 $\alpha$ ), which must first  
63 dimerise in order to mediate the stress signal. Different inhibitors have been proposed in  
64 order to block the UPR at the level of IRE1 $\alpha$ . We here unveil, through detailed computational  
65 studies, the mode of action of a set of IRE1 $\alpha$  inhibitors targeting the kinase domain, which in  
66 turn helps us to further understand the mechanism of activation and progression of the UPR.

67

68

69

## 70 1. Introduction

71 The accumulation of misfolded proteins in the endoplasmic reticulum (ER) triggers an  
72 evolutionarily conserved intracellular signaling pathway called the unfolded protein response  
73 (UPR)(1). The UPR is mainly an adaptive response to re-establish ER proteostasis through the  
74 signaling of three transmembrane proteins, inositol-requiring protein 1 $\alpha$  (IRE1 $\alpha$ , hereafter  
75 IRE1), protein kinase R (PKR)-like ER kinase (PERK), and activating transcription factor 6  
76 (ATF6)(2). IRE1 represents the most evolutionarily conserved branch of the UPR: it is a  
77 multidomain protein with an N-terminal luminal domain and cytosolic kinase and RNase  
78 domains connected by a transmembrane linker(2). Upon activation, IRE1 dimerizes, trans-  
79 autophosphorylates and oligomerizes, thereby activating the IRE1 RNase domain which is able  
80 to remove a 26 nucleotide intron from X-Box Binding Protein 1 (XBP1) mRNA. Upon re-ligation  
81 by RNA-splicing ligase RtcB, spliced XBP1 (XBP1s) is formed(2). XBP1s protein is a potent  
82 transcription factor and its target genes in turn permit the ER to adapt to stress conditions(2).  
83 There are several models that explain how ER stress is sensed by IRE1(3). One of the  
84 established models links its trans-autophosphorylation with face-to-face dimer orientation as  
85 the first step of IRE1 activation (Figure 1A), and subsequent transition to back-to-back dimer  
86 (Figure 1B) and larger oligomeric structure formation to stimulate the RNase domain  
87 activity(3).

88 IRE1 signaling is implicated in the etiology of various diseases(2, 4), including cancer where  
89 tumor cells activate the UPR to avoid apoptosis and survive(5). Thus, IRE1 has been the recent  
90 focus of several drug discovery projects in cancer research(6). Current IRE1 modulators can  
91 be categorized as (i) direct IRE1 RNase inhibitors(6, 7), (ii) ATP-competitive kinase inhibitors  
92 that activate RNase(8) and (iii) ATP-competitive kinase inhibitors that decrease RNase  
93 activity(8, 9), the latter also known as 'kinase inhibiting RNase attenuators' (KIRAs).  
94 Optimized KIRA compounds include KIRA6(10), KIRA7(4) and KIRA8(11). KIRA6 and KIRA7  
95 possess an imidazopyrazine scaffold(10), whereas KIRA8 is a sulfonamide compound with high  
96 selectivity(11).

97 The observation that KIRAs allosterically inhibit IRE1 RNase domain was confirmed by a  
98 competitive *in-vitro* assay where ATP-competitive RNase activators were shown to completely  
99 restore the RNase activity in presence of KIRA(8). The model proposed by Feldman *et al.*  
100 speculates that KIRAs stabilize the DFG-out kinase domain conformation and helix- $\alpha$ C

101 displacement that makes it incompatible with back-to-back dimer formation, thereby leading  
102 to kinase and RNase inhibition(8).

103 Herein, we propose an alternative, and we think more likely, model to rationalize the link  
104 between kinase binding and RNase domain inhibition by the KIRA compounds based on  
105 molecular level analyses of structures and dynamics of IRE1 in complex with KIRA  
106 compound **16** (Figure 1C); numbering from the original paper(9) (hereafter referred to as  
107 KIRA).

108

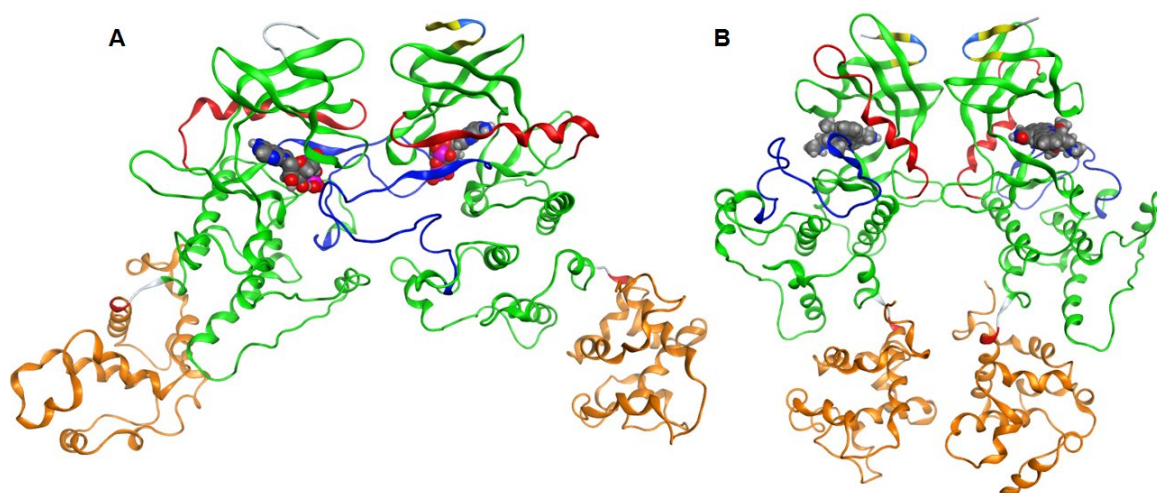

109

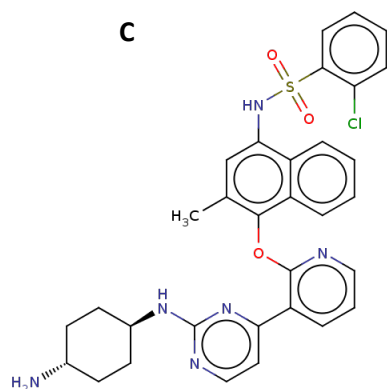

110

111 **Figure 1.** Ribbon diagram representing the structure of the IRE1 kinase and RNase of (A) the  
112 face-to-face dimer (PDB 3P23) and (B) back-to-back arrangement (PDB 4YZC). The kinase  
113 domain is shown in green (residues 571-832), the helix- $\alpha$  in red (residues 603-623), the  
114 activation segment in blue (residues: 711-741) and the RNase domain in orange (residues 837-  
115 963). ADP (A) and staurosporine (B) are highlighted in space-filling models to indicate the  
116 kinase binding sites. (C) 2D molecular representation of KIRA.

117

118 Using protein-protein docking(12), protein-ligand docking(13) and molecular dynamics  
119 (MD) simulations(13) we investigate structure and dynamics of the two relevant IRE1 dimer  
120 structures (Figure 1), face-to-face and back-to-back, critical for trans-autophosphorylation  
121 and RNase activity,(3) respectively. Using models in the presence and absence of KIRA  
122 bound to the kinase pocket, we propose a mechanistically-based model of how KIRAs inhibit  
123 the RNase activity of IRE1 by allosteric interaction with the kinase domain.

124

## 125 **2. Methods**

### 126 **2.1. Selection and preparation of IRE1 crystal structure**

127 IRE1 crystal structures with PDB codes 4U6R (KIRA-bound monomer), 3P23 (ADP bound face-  
128 to-face dimer) and 4YZC (staurosporine bound back-to-back dimer) were prepared using  
129 Schrödinger protein preparation wizard(14). Using the 3P23 PDB structure, the face-to-face  
130 dimer was obtained by deleting Chain C and D and generating missing loops using Prime(15).  
131 Hydrogen atoms were added and the protonation and tautomeric states of Asp, Glu, Arg, Lys  
132 and His were adjusted to match a pH of 7.4. Possible orientations of Asn and Gln residues were  
133 generated. Finally, the IRE1 dimer and monomer structures were subjected to geometry  
134 refinements using the OPLS3 force field(16) in restrained minimizations.

### 135 **2.2. Protein-Protein Docking**

136 A protein-protein docking analysis was performed to understand the structural basis of IRE1  
137 recognition and regulation mediated by KIRA. Initially, five different protein-protein docking  
138 programs were chosen: SwarmDock(17), ZDOCK(18), HsymDock(19), PatchDock(20) and  
139 ClusPro(21). The ability of the programs to reproduce the native IRE1 dimers (PDB code 4YZC  
140 for back-to-back and 3P23 for face-to-face) was checked. The best performing program,  
141 SwarmDock(17), was then used for predicting the structures of KIRA-bound dimers using the  
142 4U6R PDB monomer structure. A schematic representation of the method used is shown in  
143 Figure 2.

144

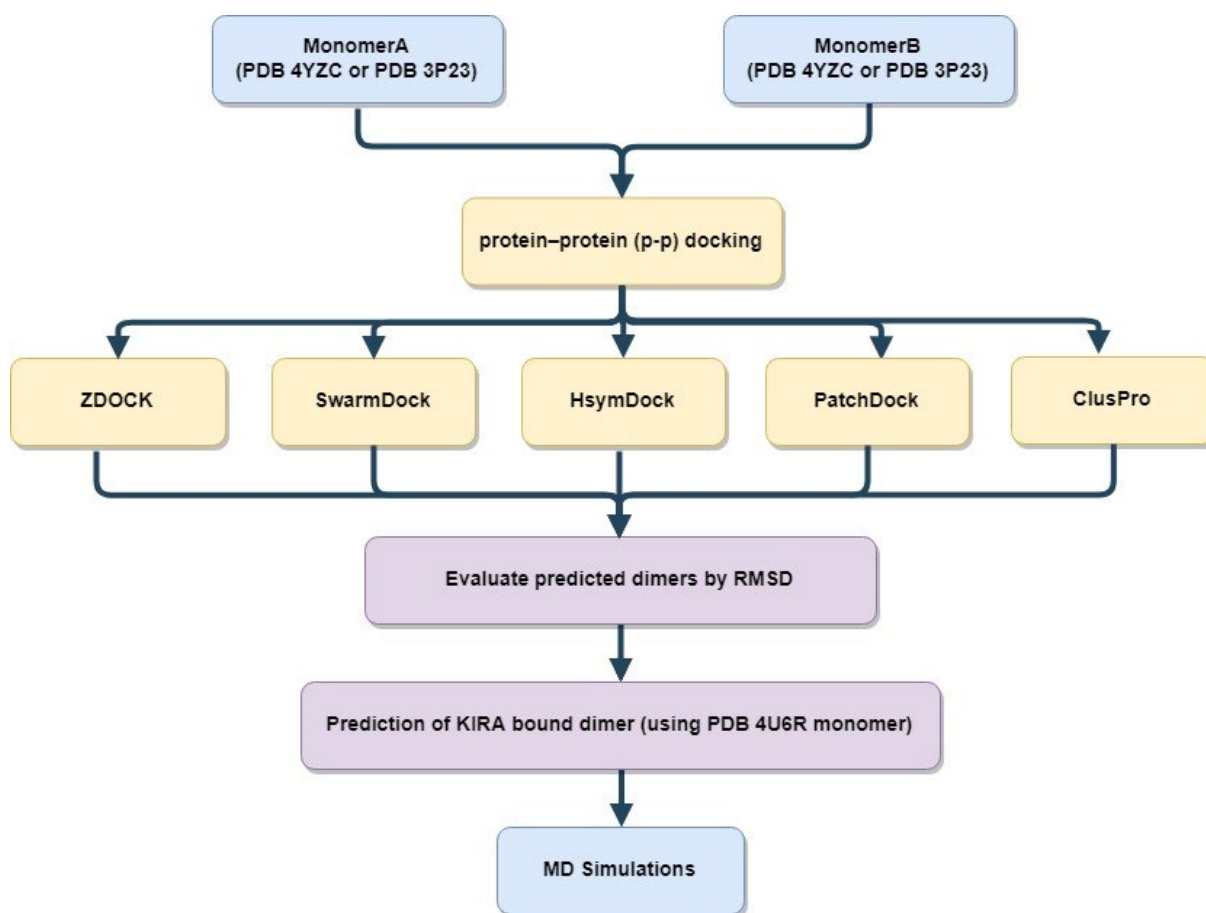

145

146 **Figure 2.** Schematic representation of protein-protein docking scheme used for predicting  
147 KIRA-bound dimer structures.

148

### 149 **2.3. KIRA preparation for docking studies**

150 The co-crystallized ligand from PDB 4U6R as shown in Figure 1C was extracted from the PDB  
151 structure and used for docking studies. KIRA is displayed in Figure 1C. KIRA was prepared using  
152 LigPrep(22) in the Schrödinger suite(23). The OPLS3 force field(16) was used for KIRA  
153 preparation steps and possible protonation and ionization states were assigned using Ionizer  
154 at pH 7.4.

### 155 **2.4. Molecular docking of KIRA**

156 KIRA was docked in the kinase pocket of the IRE1 dimer back-to-back (PDB code: 4YZC) and  
157 face-to-face (PDB code: 3P23) structures, using the Glide program(24) in Schrödinger(23) with  
158 the receptor grids prepared using the OPLS3 force field(16). The molecule was docked in the  
159 kinase domain of both monomers of each dimer. IRE1 dimers in apo form were obtained by

160 deleting the small organic molecules and ions present in the crystal structures, from the kinase  
161 active site (*i.e.*, ADP and Mg<sup>2+</sup> in the 3P23 PDB structure and staurosporine in the 4YZC PDB  
162 structure, respectively). Two grid centers per dimer (*i.e.*, one per each kinase active site) were  
163 prepared, each cubic grid with a side length of 20 Å. The grid center was set at the centroid of  
164 Lys599, a residue crucial for the kinase activity. XP (Extra Precision) docking mode and flexible  
165 ligand sampling were employed in the docking procedure. All other parameters were set to  
166 default values.

## 167 **2.5. Molecular Dynamics Simulations**

168 The stability of the native crystallographic dimer structures of the IRE1 in back-to-back (PDB  
169 4YZC) and face-to-face (PDB 3P23) conformer were compared with the predicted KIRA-bound  
170 dimer forms, based on 300 ns MD simulations. For KIRA bound dimers we used both  
171 complexes with KIRA docked in the kinase active site of the dimer structures 4YZC and 3P23,  
172 and dimer structures generated from KIRA-co-crystallized IRE1 monomers.

173 For the MD simulations, the following steps were followed:

174 **a.** Systems preparation: Systems include the experimental IRE1 dimer structures (PDB 4YZC,  
175 3P23), predicted dimers (from KIRA bound monomer) (section 2.2), and KIRA-docked dimer  
176 forms (section 2.4). The systems were prepared separately as discussed in section 2.1.

177 **b.** Ligand parameterization: ligands (ADP, staurosporine and KIRA) were parametrized with  
178 GAFF as implemented in Ambertools2018 by using the Antechamber interface tool(25). AM1-  
179 BCC atomic point charges(26) were calculated using Antechamber(27).

180 **c.** Molecular dynamics simulation protocol: MD simulations were performed using the  
181 GROMACS 5.1 package(28), with the AMBER14SB force field for the protein(29). The systems  
182 were explicitly solvated using cubic water boxes with cell borders placed at least 10 Å away  
183 from the protein or ligand atoms using TIP3P water(30) under periodic boundary conditions.  
184 The systems were first neutralized and Na<sup>+</sup>/Cl<sup>-</sup> counter ions were added to give a physiological  
185 salt concentration of 0.154 M. All simulation runs consisted of energy minimization until the  
186 force was less than 1000 kJ mol<sup>-1</sup> nm<sup>-1</sup>, 200 ps under NVT conditions subjected to position  
187 restrained equilibration on the heavy atoms of IRE1, 200 ps equilibration and 300 ns of  
188 classical molecular dynamics simulation under NPT conditions. The simulations were run in

189 triplicate (referred to as Replica 1, 2 and 3). In all simulations, the temperature was kept at  
190 300 K by the velocity rescaling thermostat(31) with a coupling constant of 0.1 ps, and pressure  
191 at 1.01325 bar using the Parrinello-Rahman barostat(32) with a coupling time of 5.0 ps,  
192 excluding NVT pre-simulation steps. Constraints were applied on all bonds using the LINCS  
193 algorithm(33). The leap-frog algorithm(34) was employed in the simulations, with integration  
194 timesteps of 2 fs.

195 The structural deviations during the MD simulation were analyzed using RMSD, number of  
196 distinct hydrogen bonds and energy terms such as electrostatic (Ele) and van der Waals (vdW)  
197 interactions using built-in tools in the GROMACS 5.1 package(28). For analyzing the dimer  
198 interface RMSD, an index file was created with specific residues. The dimer interface was  
199 defined as any pair of C $\alpha$  atoms from one monomer within 10 Å of the other in the face-to-  
200 face and back-to-back dimers(35, 36).

## 201 **2.6 Data availability**

202 All simulation protocols are provided as tarballs (.tar.gz) freely accessible at zenodo.org as  
203 DOI: 10.5281/zenodo.3368654.

204 There are eighteen tarball (**.tar.gz**) files, three replicas for each of the systems investigated.

205 The contents of each tarball is as follows:

- 206 1. a source PDB (**.pdb**) file
- 207 2. leap.log - commands used to create the .prmtop and .inpcrd files
- 208 3. Two AMBER parameter/topology (**.prmtop**) and an AMBER coordinate (**.inpcrd**) file
- 209 4. **.mdp file** used for performing all the minimisation, relaxation, equilibration and production  
210 run steps
- 211 5. Executable **script (i.e. job009)** that was used to perform the production run
- 212 6. trajectory (**.xtc**) files for each independent MD simulations

213

## 214 **3. Results and discussion**

### 215 **3.1 Protein-Ligand Docking analysis**

216 KIRA bound IRE1 dimer crystal structures are not available. To predict the KIRA binding in  
217 dimers, the compound was docked in the IRE1 back-to-back (PDB code: 4YZC) and face-to-face



218 (3P23) structures. Visual inspection of the docked poses revealed a different binding mode of  
219 KIRA compared to the 4U6R PDB structure (Figure S1). In particular, in the face-to-face dimer  
220 KIRA binding is mainly stabilized by electrostatic interaction with Asp711, Asp688 and Lys690  
221 (Fig S2A and B) and in the back-to-back dimer with Glu651 and Cys645 (Fig S2C and D) while  
222 the co-crystallized KIRA interacts mainly with Lys599, Glu651, Cys645, Phe712 and Ile642 as  
223 reported in previous studies(9, 37).

### 224 **3.2. Protein-Protein Docking analysis**

225 To address the questions regarding the effect of KIRA binding on the IRE1 dimer formation,  
226 and if KIRA is able to structurally interfere with either the face-to-face or back-to-back dimer  
227 form, or both, we assessed if the KIRA-bound monomer structure (PDB code: 4U6R) is capable  
228 of forming dimer structures.

229 In order to identify an appropriate protein-protein docking program, a series of docking  
230 experiments were performed using five freely available programs. Starting from the known  
231 crystallographic dimer structures of IRE1 in back-to-back (PDB code: 4YZC) and face-to-face  
232 (3P23) conformers, we split the crystal structure into monomers and tried to reproduce the  
233 dimer complexes with the programs. The docking results are shown in Table 1 and S1.

234

235 **Table 1.** RMSD<sup>a</sup> results of five different protein–protein docking approaches to reproduce the  
236 known IRE1 dimer complexes.

|                  | <b>Face-to-face dimer<br/>(PDB code: 3P23 )</b> | <b>Back-to-back dimer<br/>(PDB code: 4YZC)</b> |
|------------------|-------------------------------------------------|------------------------------------------------|
| <b>SwarmDock</b> | 1.39                                            | 3.56                                           |
| <b>ZDOCK</b>     | 12.48                                           | 3.32                                           |
| <b>HsymDock</b>  | 3.12                                            | 13.25                                          |
| <b>PatchDock</b> | 24.33                                           | 29.49                                          |
| <b>ClusPro</b>   | 3.58                                            | 31.01                                          |

237 <sup>a</sup>Root-mean-square deviation (RMSD) is calculated for C $\alpha$  atoms by superimposing the top-scored  
238 docked pose generated by the program with the crystallographic structures.

239

240 Evaluating the RMSD over the five top-scored docked poses for all programs studied here  
241 (Table S1), we note that the top-scored docking pose in almost all cases is also the one with  
242 lowest RMSD. Of the five docking programs tested in the current study, SwarmDock was able  
243 to reproduce the native crystallographic back-to-back (PDB code: 4YZC) and face-to-face (PDB

244 code: 3P23) dimers structures of the IRE1 to an RMSD of 3.56 and 1.39 Å, respectively, as  
245 shown in Figure 3. SwarmDock was thus also used for predicting dimers of the KIRA-bound  
246 monomer structures (PDB 4U6R) in the back-to-back and face-to-face orientations.

247 We first evaluated steric clashes at the interchain region by superposing the monomer of the  
248 4U6R PDB structure on each monomer of the native crystallographic structures of the IRE1  
249 back-to-back and face-to-face dimers (Figure S3). The KIRA-bound dimer forms produce  
250 several steric clashes at interchain level, especially at the helix- $\alpha$ C and the activation segment  
251 in KIRA-bound face-to-face dimer (Figure S3). We note that the backbone of Glu604 and the  
252 carboxylate group of Glu735 create steric clashes with the guanidino group of Arg600 and the  
253 carboxylate of Glu735, located in the helix- $\alpha$ C and the activation segment, respectively (Figure  
254 S3). In the back-to-back dimer the guanidine groups of Arg627 and Arg905 create potential  
255 steric clashes with the guanidine groups of Arg627 and Arg905 located in the other monomer  
256 of the symmetric complex (Figure S3).

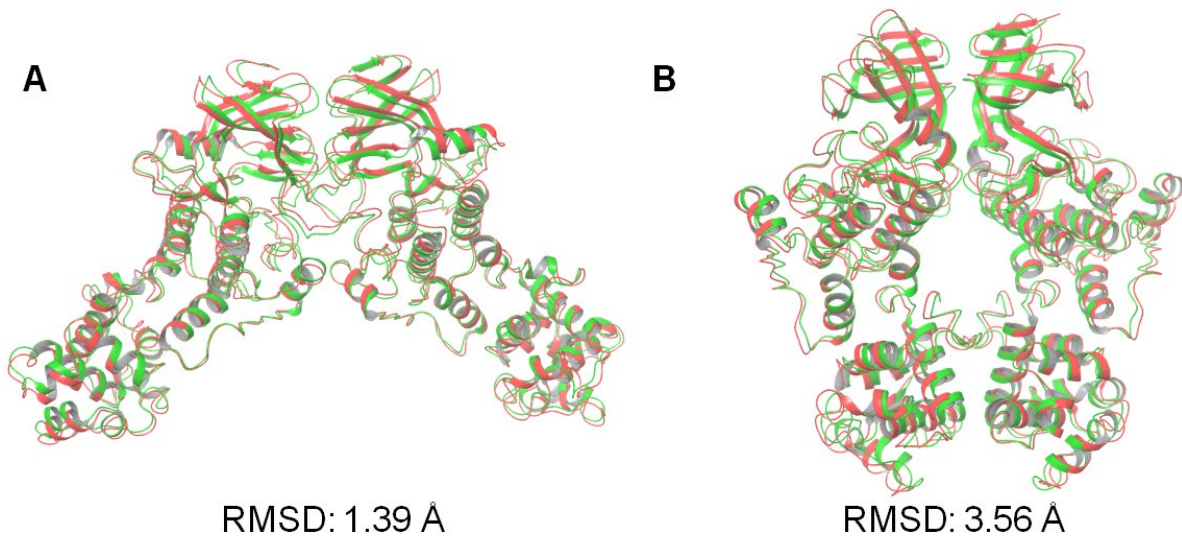

257  
258 **Figure 3.** Superposition of the predicted best-scoring poses predicted by SwarmDock (green),  
259 onto the crystallographic dimer structures (red) of the IRE1 in (A) face-to-face (PDB code:  
260 3P23) and (B) back-to-back (PDB code: 4YZC) conformations. RMSD values based on the  
261 positions of the C $\alpha$  atoms relative to the crystallographic structures.

262

263 Results from the protein-protein docking calculations of the KIRA-bound dimer forms  
264 performed using SwarmDock are shown in Figure 4. The best docked results were analyzed  
265 further through MD simulations.

266 The best docked pose (in terms of C $\alpha$  atom RMSD) generated for the face-to-face dimer shown  
267 in Fig. 4A is very far from the experimental one, with an RMSD of 24.24 Å. No structures with  
268 better RMSD were found within the 5 top scoring docking poses (RMSD 24.24, 25.29, 34.11,  
269 27.49 and 25.40 Å, respectively). Since the program is shown to successfully predict the  
270 crystallographic dimer forms, the high RMSD values are not likely a result of bad sampling.  
271 Rather, the KIRA induced conformational changes have rendered the system incapable of  
272 appropriate dimer formation.

273 Comparison of the best back-to-back docking pose obtained using the 4U6R PDB structure and  
274 the crystal structures of the back-to-back dimer was also performed (Figure 4B). The RMSD  
275 analysis for the best docking pose gives a value near 4 Å, in line with the RMSD value identified  
276 when using the native monomer structure (Table 1).

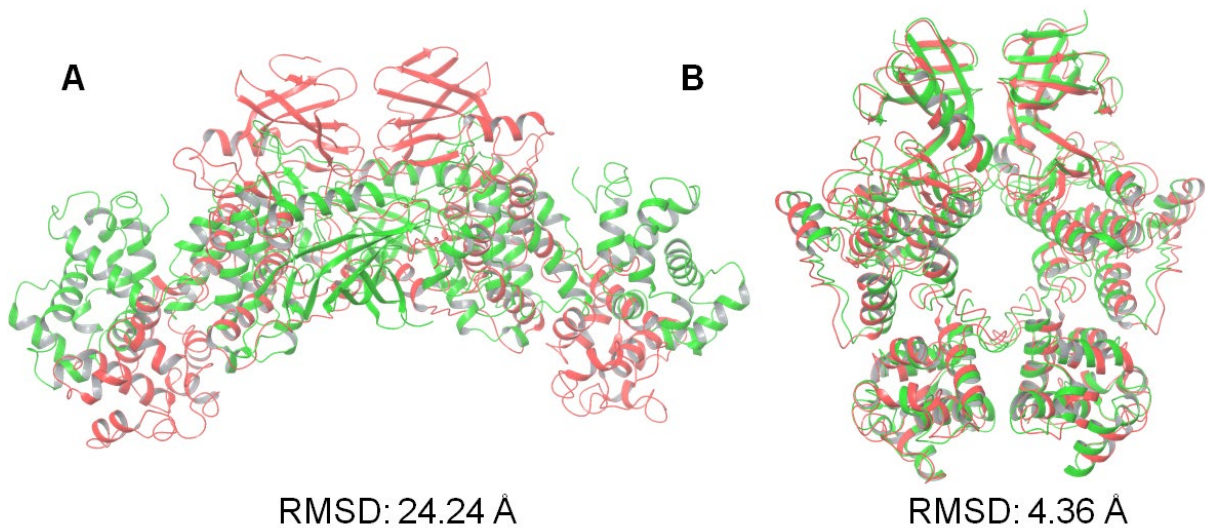

277

278 **Figure 4.** Illustration of the protein-protein docking results of KIRA containing IRE1 monomers  
279 (PDB code: 4U6R). Values shown are the RMSD in angstrom in Å of the positions of the C $\alpha$   
280 atoms of the best-scoring docked pose (green) against the native IRE1 dimer structure in (A)  
281 face-to-face (PDB code: 3P23) and (B) back-to-back (PDB code: 4YZC) conformation (red).

282

283

284

### 285 3.3. MD simulations analysis: influence of KIRA on the face-to-face dimer

286 Three different IRE1 face-to-face dimers were explored further, namely the native crystal  
287 dimer structure (PDB code: 3P23), the native structure (PDB 3P23) with KIRA docked in the  
288 active sites, and the protein-protein docked pose of PDB 4U6R in the face-to-face dimer. The

289 stability of each of the three systems was analyzed during three MD replicas, each replica  
290 being 300 ns duration.

291 To assess the structural stabilities, RMSD values of each dimer and of the dimer interfaces  
292 were calculated (Figure 5). For each replica, the calculations were done by considering the  
293 structures present in the minimized, equilibrated systems as the reference points. RMSD  
294 values were analyzed as the functions of simulation time. The three replicas for the native  
295 face-to-face crystal dimer (PDB code: 3P23) reveal that the IRE1 dimer is stable as evidenced  
296 by low and relatively constant RMSD values of the three independent trajectories (Figures 5A  
297 and D). In contrast, the KIRA-docked face-to-face dimer and the predicted PDB 4U6R dimer  
298 reach higher values of RMSD (Figures 5B, C, D and E) indicating that these dimers explore more  
299 distorted complexes compared to the native IRE1 face-to-face dimer. Conformations with  
300 large interface RMSD were visually examined and by comparing the distance of the center of  
301 mass (COM) of each RNase domain in each dimer with the native face-to-face dimer we  
302 analyze the impact of KIRA on the stability of the system (Figure S4). The COM distance of the  
303 RNase domain in the KIRA docked in PDB 3P23 dimer and in the protein-protein docked pose  
304 of PDB 4U6R in face-to-face dimer form are significantly higher compared to native IRE1 dimer  
305 demonstrating the impact of KIRA on the stability of the system (Figure S4).

306

307

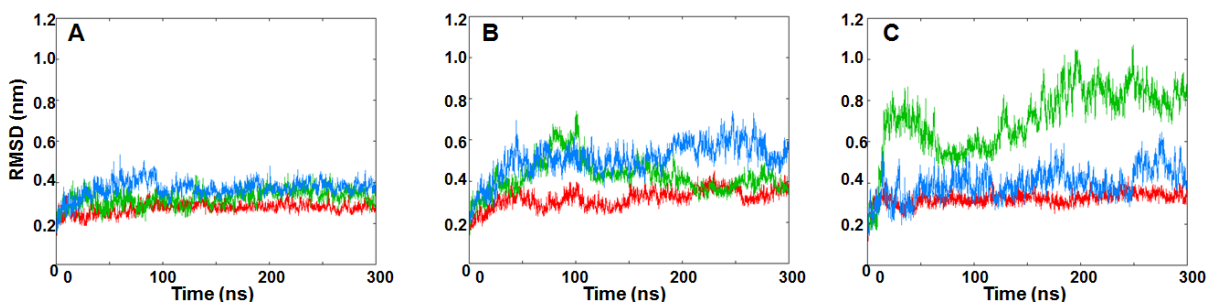

308

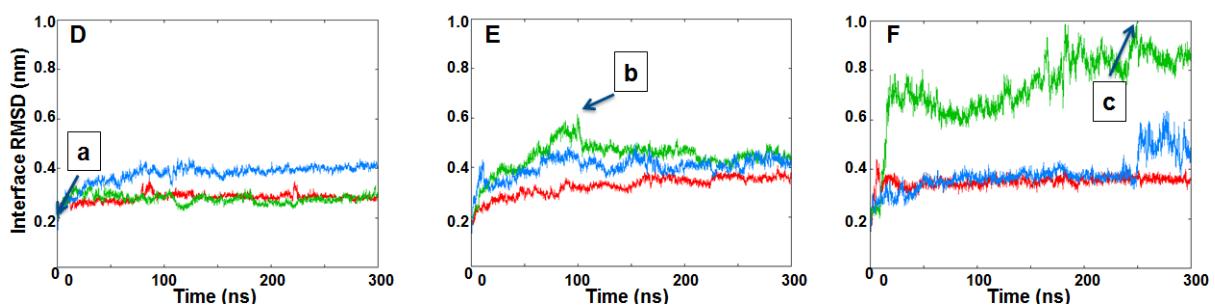

309 **Figure 5.** RMSDs of IRE1 face-to-face dimer C $\alpha$  atoms during the three MD simulation replicas  
310 of (A) Native face-to-face crystal dimer structure (PDB code: 3P23), (B) KIRA docked in PDB  
311 3P23 dimer, (C) protein-protein docked pose of PDB 4U6R in face-to-face dimer form.  
312 Interface RMSDs of IRE1 face-to-face dimer C $\alpha$  atoms during the three MD simulation replicas  
313 of (D) Native face-to-face crystal dimer structure (PDB code: 3P23), (E) KIRA docked in PDB  
314 3P23 dimer, (F) protein-protein docked pose of PDB 4U6R in face-to-face dimer form. Replicas  
315 1, 2, and 3 are represented in red, green and blue, respectively. Individual frames of the MD  
316 simulations labeled a, b and c are shown in Figure S4.

317

318 To further analyze the system deviation, the interaction energy and the number of H-bonds  
319 between the monomers were computed (Figure 6). Interaction energy analysis between the  
320 monomers reveals a smaller energetic stabilization of the KIRA-docked face-to-face dimer and  
321 the protein-protein docked pose of PDB 4U6R in face-to-face dimer form, compared to the  
322 native face-to-face crystal dimer (PDB code: 3P23) (Figure 6). The same trend was confirmed  
323 by the H-bonds analysis, with a higher number of H-bonds occurring between the native IRE1  
324 face-to-face dimer compared to protein-protein docked pose and KIRA-docked face-to-face  
325 dimer (Figure 6). The overall analysis confirms our initial interpretation of the different  
326 stabilities of the three IRE1 face-to-face dimers investigated, with the native one being the  
327 more stable, indirectly reflecting the impact of KIRA on the stabilization of the IRE1 face-to-  
328 face dimer.

329 Moreover, energetic analysis of KIRA and ADP in each kinase active site of the face-to-face  
330 dimer revealed a lower energetic stabilization of ADP compared to KIRA, with each ligand  
331 being able to interact favorably with the IRE1 active site pocket for the entire simulation time  
332 during all three replicas (Figure S5).

### 333 **3.4. MD simulations analysis: influence of KIRA on the back-to-back dimer**

334 To investigate impact of KIRA on the IRE1 back-to-back dimer, three different systems were  
335 also considered here, namely the native back-to-back dimer crystal structure (PDB code:  
336 4YZC), the native dimer structure (PDB code: 4YZC) with KIRA docked, and the protein-protein  
337 docked pose of PDB 4U6R in back-to-back dimer form, respectively. The stabilities of the three  
338 systems were studied during three MD replicas, each replica being 300 ns in length.

339

340

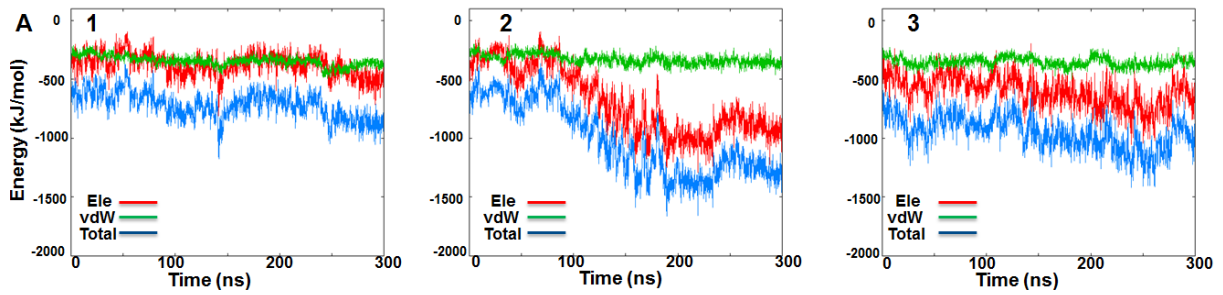

341

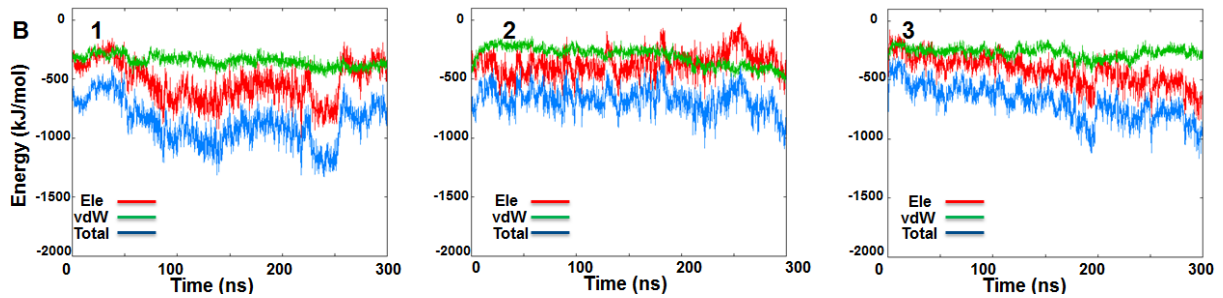

342

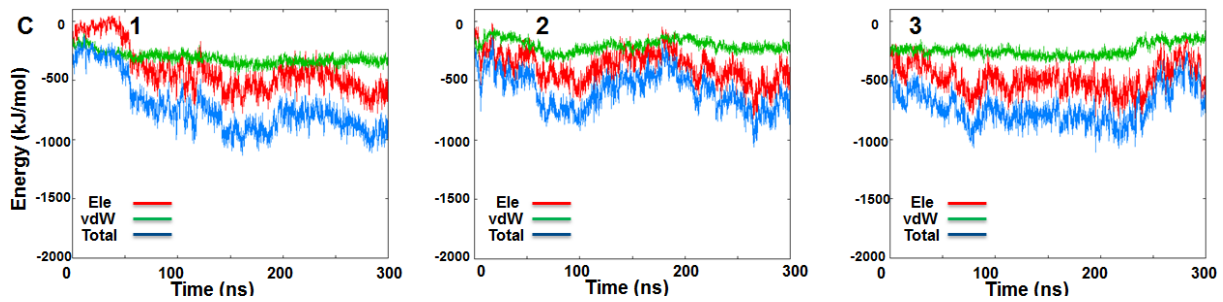

343

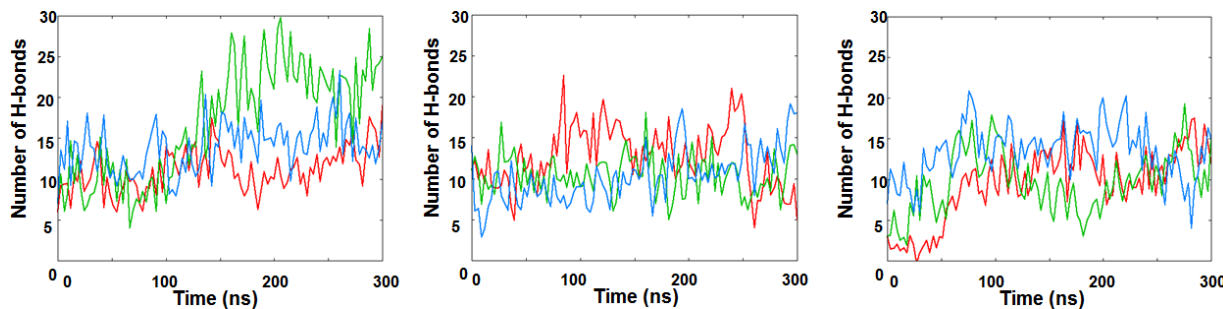

344

345 **Figure 6.** IRE1 face-to-face dimer MD simulations. Time-dependent interaction energy profiles  
346 for monomer A with monomer B during the three MD simulation replicas of (A) Native face-  
347 to-face crystal dimer (PDB code: 3P23), (B) KIRA-docked face-to-face dimer (PDB code: 3P23),  
348 (C) protein-protein docked pose of PDB 4U6R in face-to-face dimer form. Hydrogen bond  
349 analysis between monomers A and B during three MD replicas for (D) Native face-to-face  
350 crystal dimer (PDB code: 3P23), (E) KIRA-docked face-to-face dimer (PDB code: 3P23), (F)  
351 protein-protein docked pose of PDB 4U6R in face-to-face dimer form.

352

353 As reported in section 3.2 to assess the structural stability of the dimer structures, RMSD  
354 values of each dimer and the RMSD for the IRE1 dimer interface (Figure 7 and S6, respectively)  
355 were calculated. For each replica the structure present in the minimized, equilibrated system  
356 was used as the reference point and RMSD values were analyzed as functions of simulation  
357 time. The three replicas for the native back-to-back crystal dimer (PDB code: 4YZC) revealed  
358 that the IRE1 dimer is stable, as evidenced by low and relatively constant RMSD values of the  
359 three independent trajectories (Figure 7A and S6A). In contrast to the face-to-face dimer  
360 systems investigated, the KIRA-docked back-to-back dimer (PDB code: 4YZC) and the protein-  
361 protein docked pose of PDB 4U6R in the back-to-back dimer form show similar structural  
362 stabilities as the native IRE1 back-to-back dimer (Figures 7B, C and S6B and C).

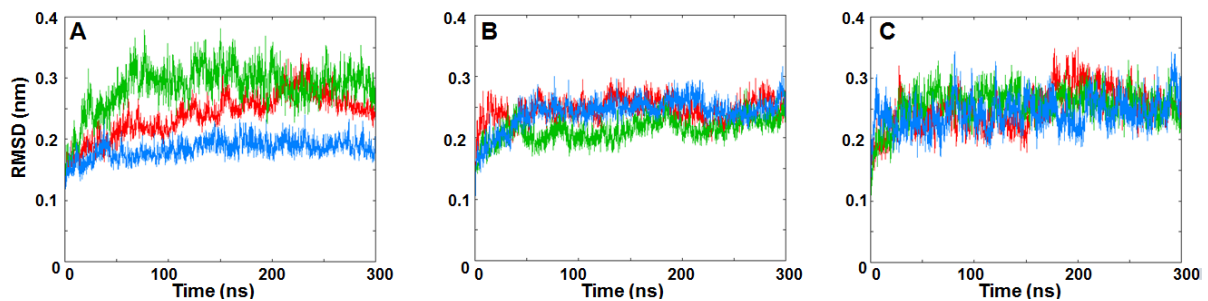

364 **Figure 7.** RMSDs of IRE1 back-to-back dimer C $\alpha$  atoms during three MD replicas for (A) Native  
365 back-to-back dimer from crystal structure (PDB code: 4YZC), (B) KIRA docked in PDB 4YZC  
366 structure and (C) protein-protein docked pose of PDB 4U6R in back-to-back dimer form. Red  
367 for Replica 1, green for Replica 2 and blue for Replica 3, respectively.

368

369 Also for the three back-to-back systems, the interaction energy and the number of H-bonds  
370 between the monomers were analyzed (Figure 8). Energetic analysis of the occurring  
371 interchain interactions shows similar energetic stabilization of all three back-to-back dimers  
372 structures, and in all three replicas (Figure 8). The same trend was confirmed by the H-bonds  
373 analysis, with an equal number of H-bonds occurring between the native IRE1 back-to-back  
374 dimer compared to protein-protein docked pose and KIRA-docked back-to-back dimer (Figure  
375 8). The overall analysis of these three IRE back-to-back dimers confirms our initial  
376 interpretation of the similar stabilities of the three dimer models. To further validate this  
377 hypothesis the last frame of each MD simulations were superposed with the native back-to-  
378 back dimer revealing an overall similar IRE1 back-to-back active conformation (Figure S7).

379

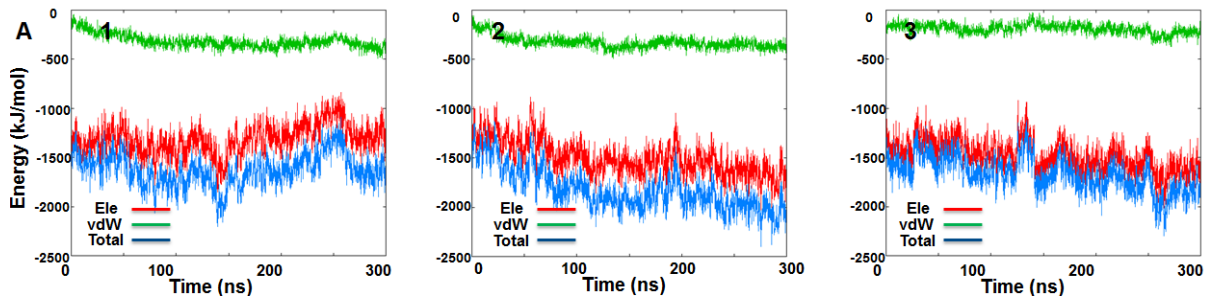

380

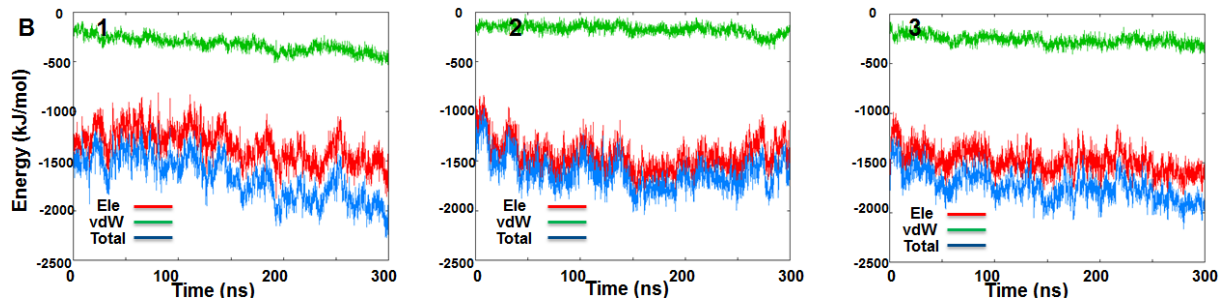

381

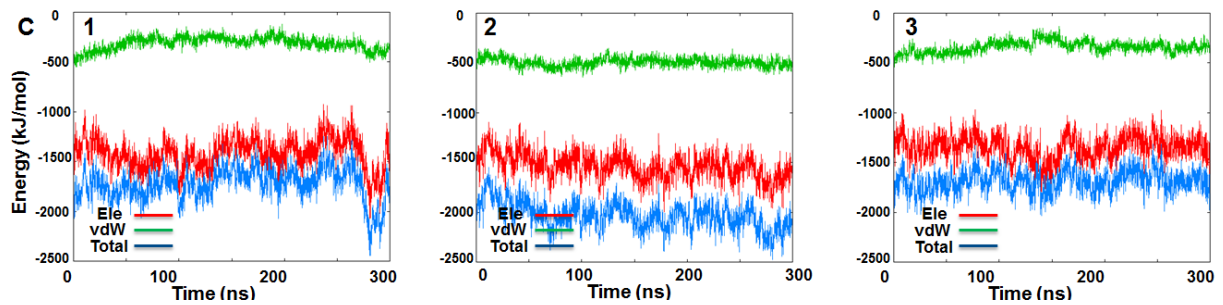

382

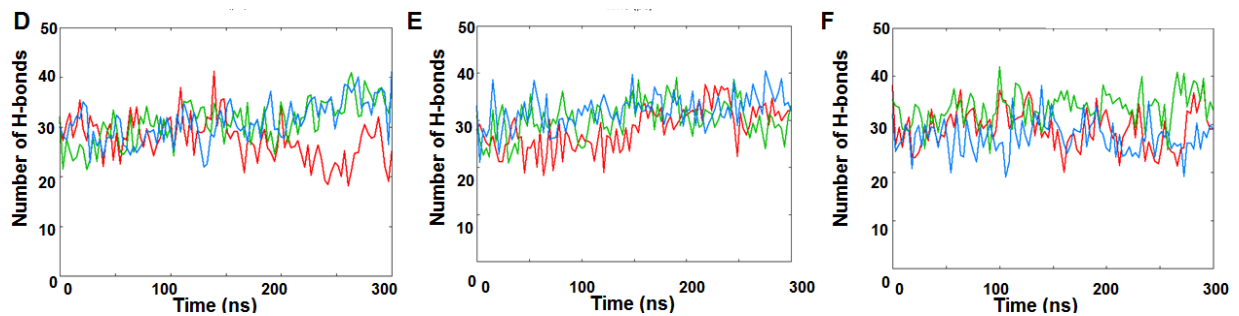

383 **Figure 8.** IRE1 back-to-back dimer MD simulation data for the three MD replicas. Time-  
384 dependent interaction energy profiles for monomer A with monomer B during the MD  
385 simulations of (A) native back-to-back dimer (PDB code: 4YZC), (B) KIRA docked in the 4YZC  
386 structure, (C) protein-protein docked pose of PDB 4U6R in back-to-back dimer. Hydrogen bond  
387 analysis between the monomers A and B during the three MD replicas for (D) native back-to-  
388 back crystal dimer (PDB code: 4YZC), (E) KIRA docked in PDB 4YZC structure, (F) protein-protein  
389 docked pose of PDB 4U6R in back-to-back dimer form.

390

391



392 Moreover, energetic analysis of KIRA and staurosporine in each kinase active site of the back-  
393 to-back dimer revealed similar energetic stabilization of staurosporine compared to KIRA, with  
394 each ligand being able to interact favorable with the IRE1 pocket active site during the entire  
395 simulation in the three replicas (Figure S8).

396

#### 397 **4. Conclusions and perspective**

398 We have investigated the impact of KIRA binding on IRE1 dimer structures. Unexpectedly, the  
399 docking and MD simulations studies reveal that KIRA can bind to the kinase pocket of IRE1 in  
400 both the native face-to-face and back-to-back forms. A detailed analysis of the IRE1 monomer-  
401 monomer interactions process for the face-to-face dimer in presence of KIRA revealed  
402 energetic destabilization, suggesting that the binding of KIRA is affecting the system already  
403 at the stage of face-to-face dimer formation. Given that IRE1 activation appears to be  
404 dependent on the close communication between the kinase and RNase domains, the data  
405 leads us to believe that KIRA has a prominent role at the early stage of IRE1 activation, by  
406 destabilizing face-to-face dimer formation. This will impair the trans-autophosphorylation  
407 process, and thus preventing IRE1 from reaching the RNase active back-to-back structure.

408 The proposed mechanism of blocking the trans-autophosphorylation provides a molecular  
409 level validation of available experimental data where KIRA compounds inhibit IRE1  
410 phosphorylation(8). This is further supported by the experimental observation that upon the  
411 inclusion of KIRAs, Western blotting reveals formation of IRE1 monomers only(8).

412 The data reported herein provide another small piece of information towards the  
413 understanding of IRE1 activity and the structural evidence of KIRA's role in the IRE1 inhibition  
414 process, representing a stimulus to explore and better understand the IRE1 signaling.

415

#### 416 **Acknowledgements**

417 This research was funded by the EU's Horizon 2020 research and innovation programme under  
418 the Marie Skłodowska-Curie grant 675448 (TRAINERS). The Faculty of Science at the University  
419 of Gothenburg and the Swedish Science Research Council (VR; grant number 2014-3914) are  
420 gratefully acknowledged for financial support (LAE) and the Swedish National Infrastructure  
421 for Computing for allocations of computing time at supercomputing centers C3SE and PDC.

422

423 **Conflicting Interests**

424 AG, AS and LE are cofounders of Cell Stress Discoveries, Ltd. No conflicting interests.

425

426 **Supplementary material**

427 RMSD data of top 5 docked poses (Table S1), Superposed structures displaying steric clashes  
428 (Figure S1), RMSDs of interface region in back-to-back dimers (Figure S2), and Structures at  
429 the three time points indicated in Figures 5D-F (Figure S3), are available as Supplementary  
430 material.

431

432 **Author Information**

433 Corresponding Author:

434 \*E-mail: leif.eriksson@chem.gu.se.

435

436 Author contributions:

437 All authors conceived the study. AC and CC performed the computations, analysed the data  
438 and wrote first draft. All authors revised the text.

439

440 **Bibliography**

- 441 1. D. Ron, P. Walter, Signal integration in the endoplasmic reticulum unfolded protein  
442 response. *Nat Rev Mol Cell Biol* **8**, 519-529 (2007).
- 443 2. A. Almanza *et al.*, Endoplasmic reticulum stress signalling - from basic mechanisms to  
444 clinical applications. *FEBS J* **286**, 241-278 (2019).
- 445 3. C. J. Adams, M. C. Kopp, N. Larburu, P. R. Nowak, M. M. U. Ali, Structure and Molecular  
446 Mechanism of ER Stress Signaling by the Unfolded Protein Response Signal Activator  
447 IRE1. *Front Mol Biosci* **6**, 11 (2019).
- 448 4. M. Thamsen *et al.*, Small molecule inhibition of IRE1alpha kinase/RNase has anti-fibrotic  
449 effects in the lung. *PLoS One* **14**, e0209824 (2019).
- 450 5. W. A. Wang, J. Groenendyk, M. Michalak, Endoplasmic reticulum stress associated  
451 responses in cancer. *Biochim Biophys Acta* **1843**, 2143-2149 (2014).
- 452 6. D. J. Maly, F. R. Papa, Druggable sensors of the unfolded protein response. *Nat Chem*  
453 *Biol* **10**, 892-901 (2014).
- 454 7. M. Sanches *et al.*, Structure and mechanism of action of the hydroxy-aryl-aldehyde class  
455 of IRE1 endoribonuclease inhibitors. *Nat Commun* **5**, 4202 (2014).
- 456 8. H. C. Feldman *et al.*, Structural and Functional Analysis of the Allosteric Inhibition of  
457 IRE1alpha with ATP-Competitive Ligands. *ACS Chem Biol* **11**, 2195-2205 (2016).
- 458 9. P. E. Harrington *et al.*, Unfolded Protein Response in Cancer: IRE1alpha Inhibition by  
459 Selective Kinase Ligands Does Not Impair Tumor Cell Viability. *Acs Med Chem Lett* **6**, 68-

- 460 72 (2015).
- 461 10. R. Ghosh *et al.*, Allosteric inhibition of the IRE1alpha RNase preserves cell viability and  
462 function during endoplasmic reticulum stress. *Cell* **158**, 534-548 (2014).
- 463 11. S. Morita *et al.*, Targeting ABL-IRE1alpha Signaling Spares ER-Stressed Pancreatic beta  
464 Cells to Reverse Autoimmune Diabetes. *Cell Metab* **25**, 1207 (2017).
- 465 12. K. A. Porter, I. Desta, D. Kozakov, S. Vajda., What method to use for protein-protein  
466 docking? *Curr Opin Struct Biol* **55**, 1-7 (2019).
- 467 13. V. Salmaso, S. Moro, Bridging Molecular Docking to Molecular Dynamics in Exploring  
468 Ligand-Protein Recognition Process: An Overview. *Front Pharmacol* **9**, 923 (2018).
- 469 14. G. M. Sastry, M. Adzhigirey, T. Day, R. Annabhimoju, W. Sherman, Protein and ligand  
470 preparation: parameters, protocols, and influence on virtual screening enrichments. *J*  
471 *Comput Aided Mol Des* **27**, 221-234 (2013).
- 472 15. M. P. Jacobson *et al.*, A hierarchical approach to all-atom protein loop prediction.  
473 *Proteins* **55**, 351-367 (2004).
- 474 16. E. Harder *et al.*, OPLS3: A Force Field Providing Broad Coverage of Drug-like Small  
475 Molecules and Proteins. *J Chem Theory Comput* **12**, 281-296 (2016).
- 476 17. M. Torchala, I. H. Moal, R. A. Chaleil, J. Fernandez-Recio, P. A. Bates, SwarmDock: a  
477 server for flexible protein-protein docking. *Bioinformatics* **29**, 807-809 (2013).
- 478 18. B. G. Pierce *et al.*, ZDOCK server: interactive docking prediction of protein-protein  
479 complexes and symmetric multimers. *Bioinformatics* **30**, 1771-1773 (2014).
- 480 19. Y. Yan, H. Tao, S. Y. Huang, HSYMDOCK: a docking web server for predicting the  
481 structure of protein homo-oligomers with Cn or Dn symmetry. *Nucleic Acids Res* **46**,  
482 W423-W431 (2018).
- 483 20. D. Schneidman-Duhovny, Y. Inbar, R. Nussinov, H. J. Wolfson, PatchDock and  
484 SymmDock: servers for rigid and symmetric docking. *Nucleic Acids Res* **33**, W363-367  
485 (2005).
- 486 21. D. Kozakov *et al.*, The ClusPro web server for protein-protein docking. *Nat Protoc* **12**,  
487 255-278 (2017).
- 488 22. Schrödinger Release 2017-1: LigPrep, Schrödinger, LLC, New York, NY, 2017.
- 489 23. Schrödinger Release 2017-1: Maestro, Schrödinger, LLC, New York, NY, 2017.
- 490 24. R. A. Friesner *et al.*, Extra precision glide: docking and scoring incorporating a model of  
491 hydrophobic enclosure for protein-ligand complexes. *J Med Chem* **49**, 6177-6196  
492 (2006).
- 493 25. J. Wang, R. M. Wolf, J. W. Caldwell, P. A. Kollman, D. A. Case, Development and testing  
494 of a general amber force field. *J Comput Chem* **25**, 1157-1174 (2004).
- 495 26. A. Jakalian, D. B. Jack, C. I. Bayly, Fast, efficient generation of high-quality atomic  
496 charges. AM1-BCC model: II. Parameterization and validation. *J Comput Chem* **23**, 1623-  
497 1641 (2002).
- 498 27. Gaussian 09, Revision B.01, M. J. Frisch *et al.* Gaussian, Inc., Wallingford CT, 2016.
- 499 28. M. James, *et al.*, GROMACS: High performance molecular simulations through multi-  
500 level parallelism from laptops to supercomputers. *SoftwareX* **2**, 19-25 (2015).
- 501 29. J. A. Maier *et al.*, ff14SB: Improving the Accuracy of Protein Side Chain and Backbone  
502 Parameters from ff99SB. *J Chem Theory Comput* **11**, 3696-3713 (2015).
- 503 30. P. Mark, L. Nilsson, Structure and dynamics of the TIP3P, SPC, and SPC/E water models  
504 at 298 K. *J Phys Chem B* **105**, 24a-24a (2001).
- 505 31. G. Bussi, T. Zykova-Timan, M. Parrinello, Isothermal-isobaric molecular dynamics using  
506 stochastic velocity rescaling. *J Chem Phys* **130** (2009).

- 507 32. M. Parrinello, A. Rahman, Polymorphic transitions in single crystals: A new molecular  
508 dynamics method. *J Appl Phys* **52**, 7182-7190 (1981).
- 509 33. B. Hess, H. Bekker, H. J. C. Berendsen, J. G. E. M. Fraaije, LINCS: A linear constraint solver  
510 for molecular simulations. *J Comput Chem* **18**, 1463-1472 (1997).
- 511 34. W. F. Van Gunsteren, H. J. C. Berendsen, A Leap-Frog Algorithm for Stochastic Dynamics.  
512 *Mol Simulat* **1**, 173-185 (1988).
- 513 35. Q. Wang, Y. Pechersky, S. Sagawa, A. C. Pan, D. E. Shaw, Structural mechanism for  
514 Bruton's tyrosine kinase activation at the cell membrane. *Proc Natl Acad Sci U S A* **116**,  
515 9390-9399 (2019).
- 516 36. A. C. Pan *et al.*, Atomic-level characterization of protein-protein association. *Proc Natl*  
517 *Acad Sci U S A* 10.1073/pnas.1815431116 (2019).
- 518 37. A. Carlesso, C. Chintha, A. M. Gorman, A. Samali, L. A. Eriksson, Binding Analysis of the  
519 Inositol-Requiring Enzyme 1 Kinase Domain. *Acs Omega* **3**, 13313-13322 (2018).

# Structural distortions induced by Kinase Inhibiting RNase Attenuator (KIRA) compounds prevent the formation of face-to-face dimers of Inositol Requiring Enzyme 1 $\alpha$ .

Antonio Carlesso<sup>1‡</sup>, Chetan Chintha<sup>2‡</sup>, Adrienne M. Gorman<sup>2</sup>, Afshin Samali<sup>2</sup> and Leif A. Eriksson<sup>1\*</sup>

<sup>1</sup>Department of Chemistry and Molecular Biology, University of Gothenburg, 405 30 Göteborg, Sweden

<sup>2</sup>Apoptosis Research Centre, National University of Ireland Galway, Galway, Ireland.

<sup>‡</sup>Equal contribution

\*Correspondence

Leif A. Eriksson, Department of Chemistry and Molecular Biology,  
University of Gothenburg, 405 30 Göteborg, Sweden.  
Email: leif.eriksson@chem.gu.se

## SUPPLEMENTARY INFORMATION

|                                                                                                                                                                                                                                                                       | Page |
|-----------------------------------------------------------------------------------------------------------------------------------------------------------------------------------------------------------------------------------------------------------------------|------|
| <b>Table S1.</b> RMSD for the 5 top-scored docked poses generated using five different protein–protein docking approaches to reproduce the known IRE1 dimer complexes.                                                                                                | S3   |
| <b>Figure S1.</b> Representation of the KIRA docking pose in (A) Chain A of 3P23 PDB code, (B) Chain B of 3P23 PDB code, (C) Chain A of 4YZC PDB code, (D) Chain B of 4YZC PDB code. The crystallographic pose of KIRA in the 4U6R PDB structure is shown in panel E. | S4-5 |
| <b>Figure S2.</b> 2D representation diagrams of the KIRA binding modes in (A) Chain A of 3P23 PDB code, (B) Chain B of 3P23 PDB code, (C) Chain A of 4YZC PDB code, and (D) Chain B of 4YZC PDB code.                                                                 | S6-8 |
| <b>Figure S3.</b> Ribbon diagram representing the structure of the KIRA-bound dimer forms obtained by superposition of the monomer of the 4U6R PDB structure on each monomer of the native                                                                            |      |

crystallographic structures of the IRE1 in (A) face-to-face (PDB 3P23) and (B) back-to-back (PDB code: 4YZC) dimers. The kinase domain is shown in green (residues 571-832), the helix- $\alpha$ C in red (residues 603-623), the activation segment in blue (residues: 711-741) and the RNase domain in orange (residues 837-963). Violet spheres = steric clashes. S9-10

**Figure S4.** Comparison of the (A) native face-to-face crystal dimer structure (PDB code: 3P23) (point 'a' in Panel D of Figure 5), with the higher interface RMSD frame identified from three independent MD replicas for (B) KIRA docked in PDB 3P23 dimer (point 'b' in Panel E of Figure 5) and (C) protein-protein docked pose of PDB 4U6R in face-to-face dimer (point 'c' in Panel F of Figure 5). The distance between the RNase domain Center of Mass (COM) of dimer is shown. The kinase domain is shown in green (residues 571-832), the helix- $\alpha$ C in red (residues 603-623), the activation segment in blue (residues: 711-741) and the RNase domain in orange (residues 837-963). ADP (A) and KIRA (B) highlighted in space-filling model to indicate the kinase binding site. S11-12

**Figure S5.** IRE1 face-to-face dimer MD simulations. Time-resolved interaction energy profiles for ADP during the three MD simulation replicas of the native face-to-face crystal dimer (PDB code: 3P23): (A) Chain A, (B) Chain B. Time-resolved interaction energy profiles during the three MD simulation replicas for KIRA docked in the native face-to-face crystal dimer (PDB code: 3P23): (C) Chain A and (D) Chain B. S13

**Figure S6.** Interface RMSDs of IRE1 back-to-back dimer C $\alpha$  atoms during the three MD simulation replicas of (A) native back-to-back crystal dimer structure (PDB code: 4YZC), (B) KIRA docked in PDB 4YZC dimer, and (C) protein-protein docked pose of PDB 4U6R in back-to-back dimer form. Replicates 1, 2, and 3 are represented in red, green and blue, respectively. S14

**Figure S7.** Superposition of the last frame of each individual MD simulation (green) of (A) native back-to-back dimer from crystal structure (PDB code: 4YZC), (B) KIRA docked in PDB 4YZC structure and (C) protein-protein docked pose of PDB 4U6R in back-to-back dimer, onto the native back-to-back crystallographic structure (PDB code: 4YZC) (red). S15

**Figure S8.** IRE1 back-to-back dimer MD simulations. Time-resolved interaction energy profiles for staurosporine during the three MD simulation replicas of the native back-to-back crystal dimer (PDB code: 4YZC): (A) Chain A, (B) Chain B. Time-resolved interaction energy profiles during the three MD simulation replicas for KIRA docked in the native back-to-back crystal dimer (PDB code: 4YZC): (C) Chain A and (D) Chain B. S16-17

**Table S1.** RMSD<sup>a</sup> for the 5 top-scored docked poses generated using five different protein–protein docking approaches to reproduce the known IRE1 dimer complexes.

|                  | <b>Face-to-face dimer<br/>(PDB code: 3P23 )</b> | <b>Back-to-back<br/>dimer (PDB code: 4YZC)</b> |
|------------------|-------------------------------------------------|------------------------------------------------|
| <b>SwarmDock</b> | 1.39, 27.47, 12.94, 16.43, 1,42                 | 3.56, 31.58, 23.99, 20.23, 34.32               |
| <b>ZDOCK</b>     | 12.48, 14.59, 0.97, 16.24, 3.65                 | 3.32, 23.70, 31.57, 33.97, 13.34               |
| <b>HsymDock</b>  | 3.12, 33.20, 39.72, 38.63, 33.62                | 13.25, 12.84, 30.68, 28.96, 35.72              |
| <b>PatchDock</b> | 24.33, 30.03, 25.45, 28.00, 32,59               | 29.49, 21.59, 28.19, 25.35, 21.79              |
| <b>ClusPro</b>   | 3.58, 11.91, 22.40, 17.65, 29.22                | 31.01, 33.02, 30.02, 34.60, 30.10              |

<sup>a</sup>Root-mean-square deviation (RMSD) is calculated for C $\alpha$  atoms by superimposing the five top-scored docked poses generated by the programs, with the crystallographic structures.

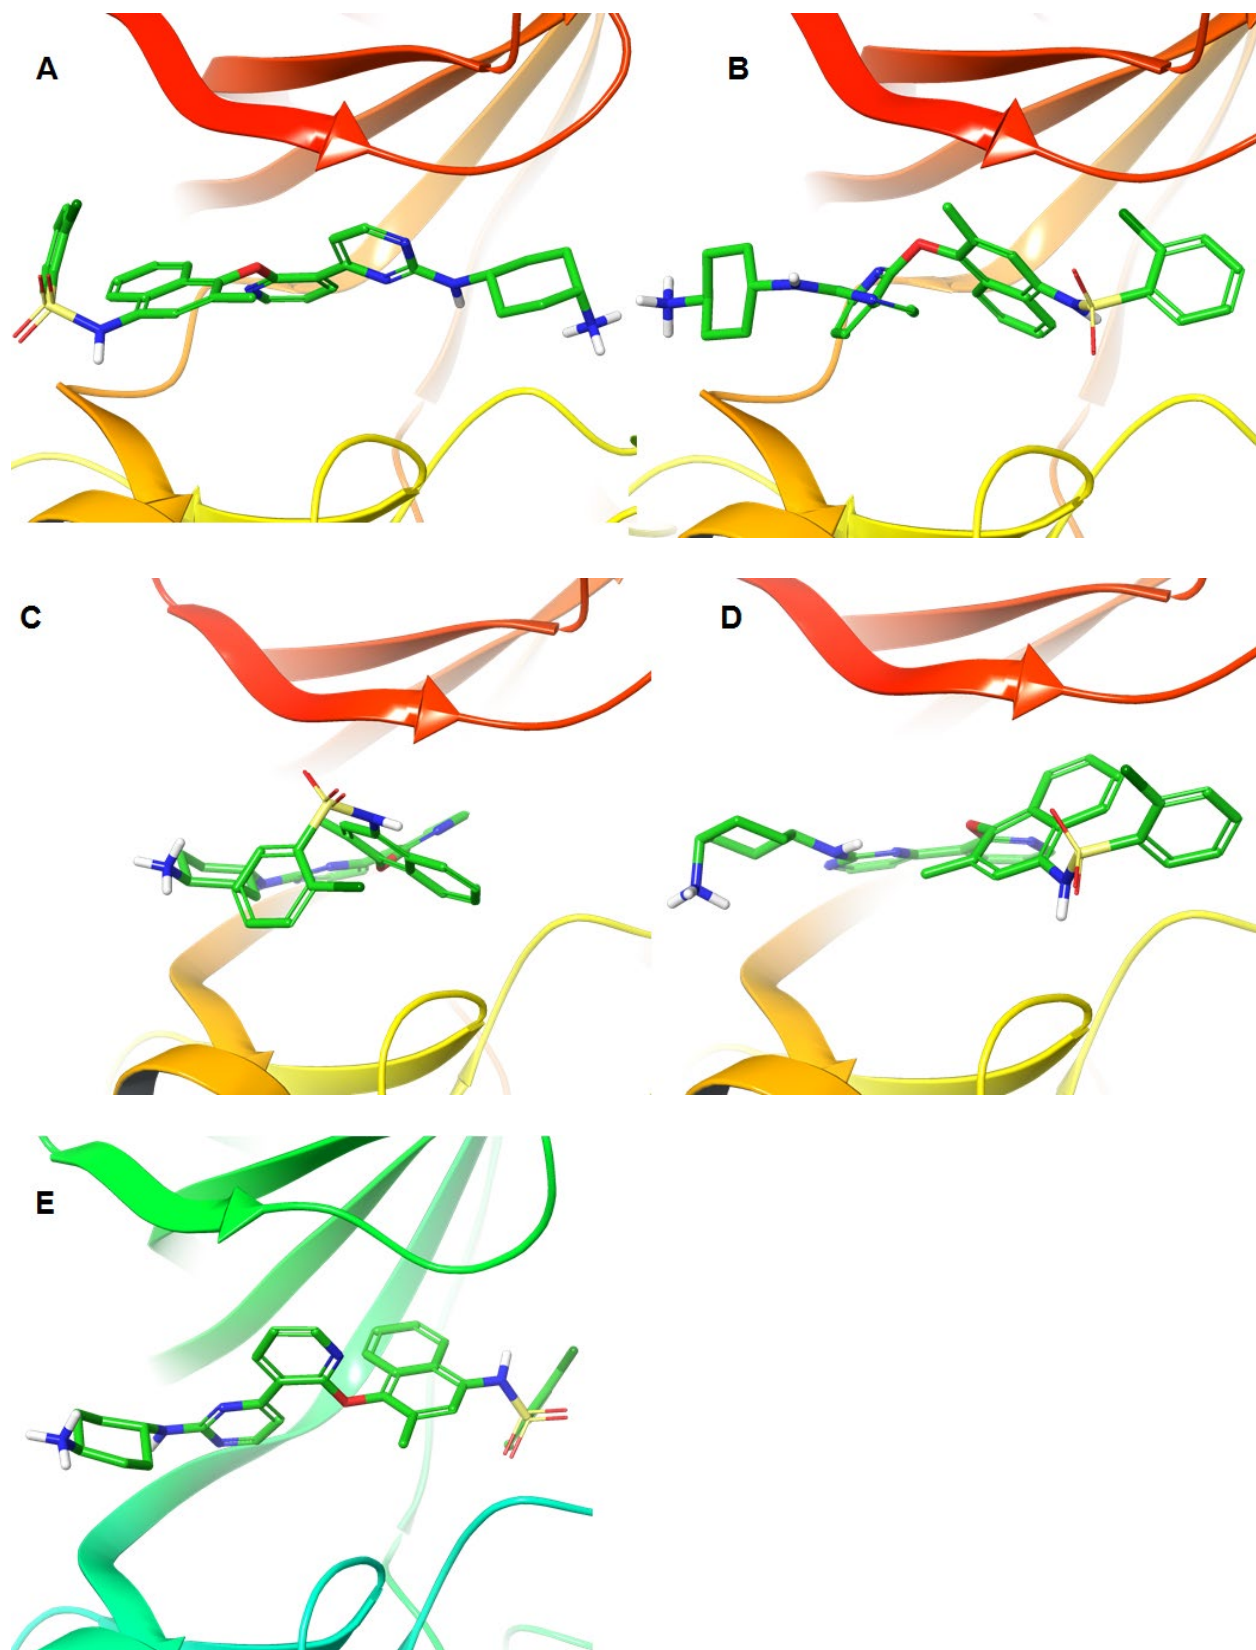



**Figure S1.** Representation of the KIRA docking pose in (A) Chain A of 3P23 PDB code, (B) Chain B of 3P23 PDB code, (C) Chain A of 4YZC PDB code, (D) Chain B of 4YZC PDB code. The crystallographic pose of KIRA in the 4U6R PDB structure is shown in panel E.

**A**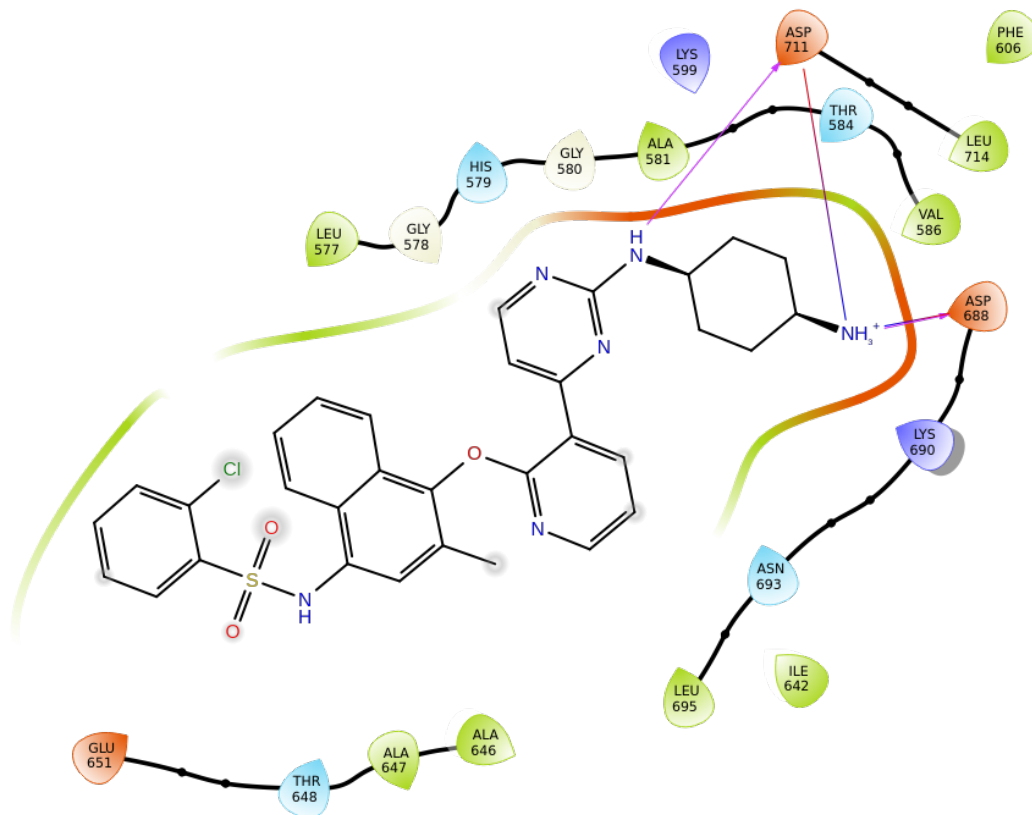**B**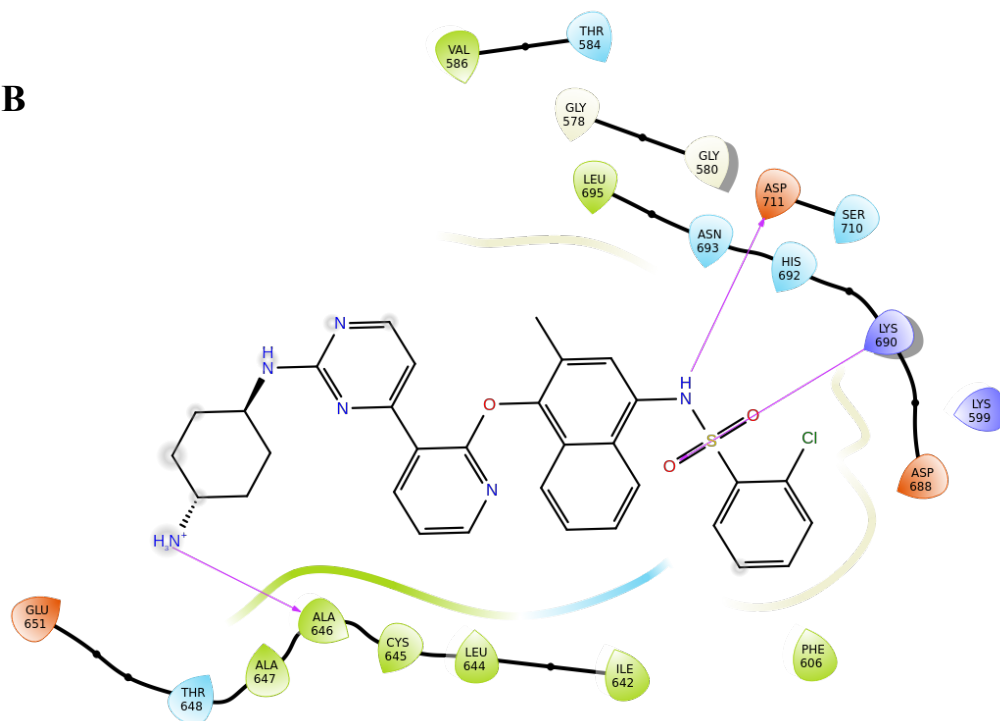

C

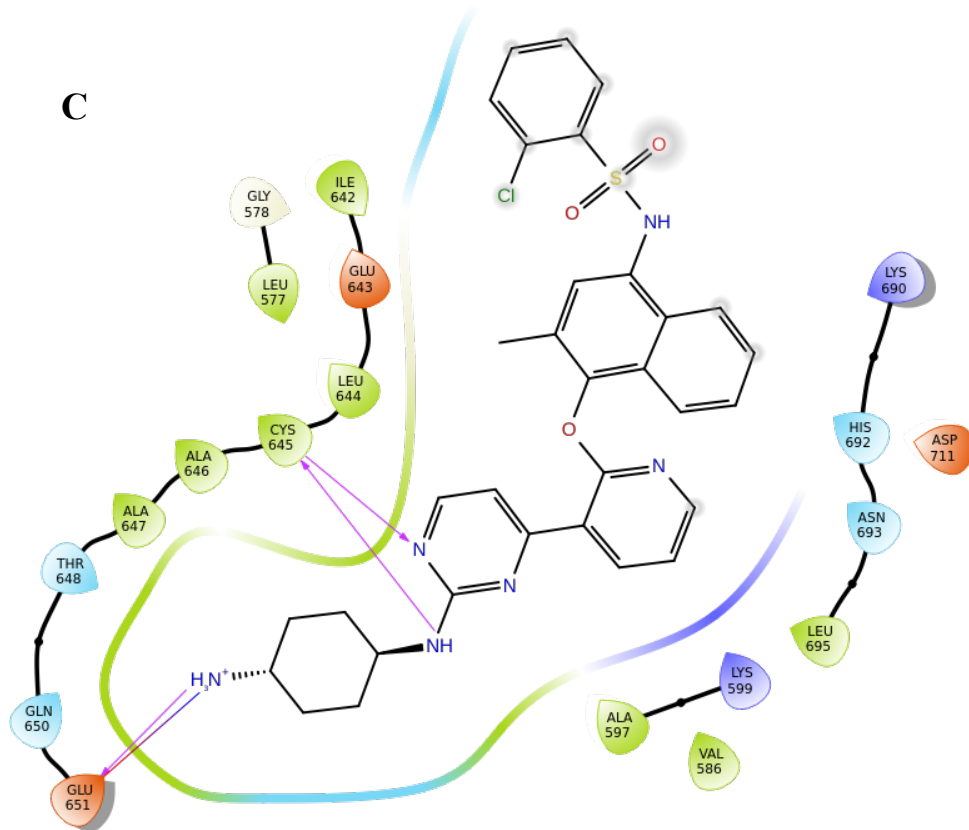

D

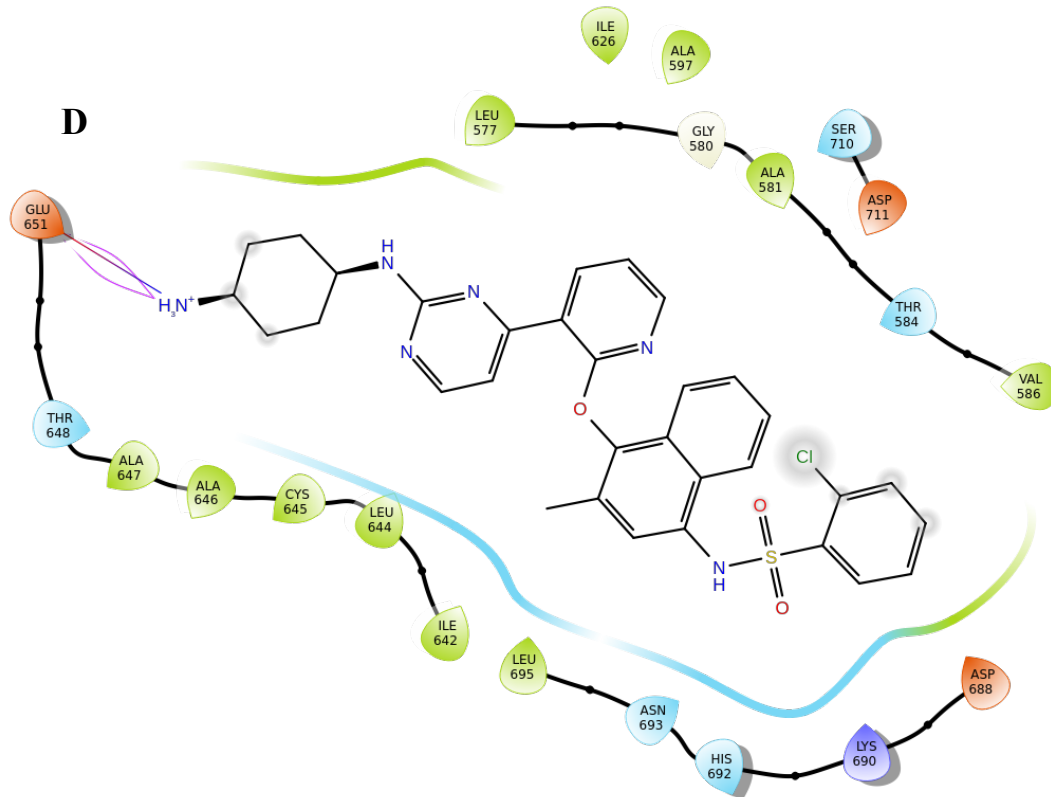

**Figure S2.** 2D representation diagrams of the KIRA binding modes in (A) Chain A of 3P23 PDB code, (B) Chain B of 3P23 PDB code, (C) Chain A of 4YZC PDB code, and (D) Chain B of 4YZC PDB code.

A

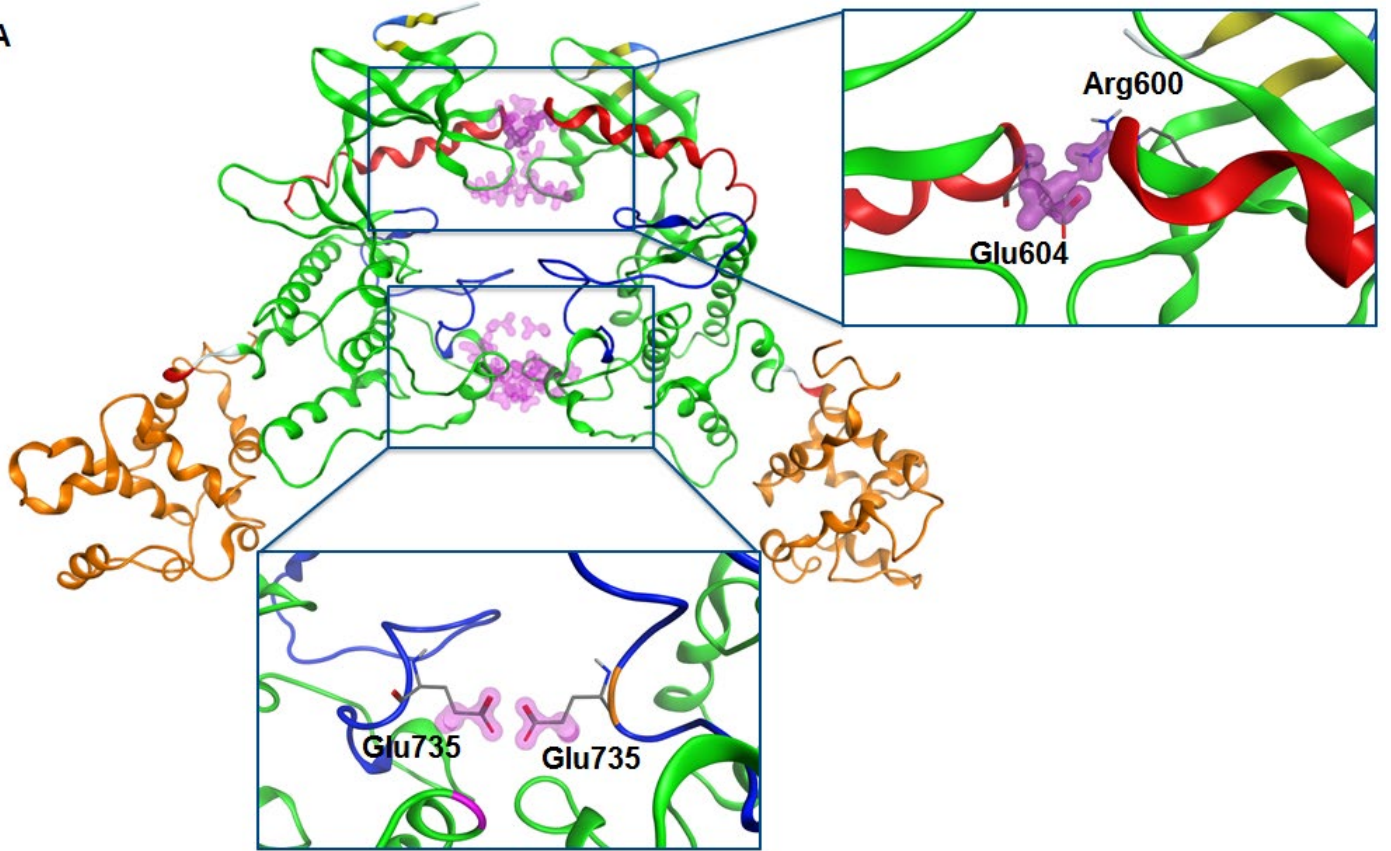

**B**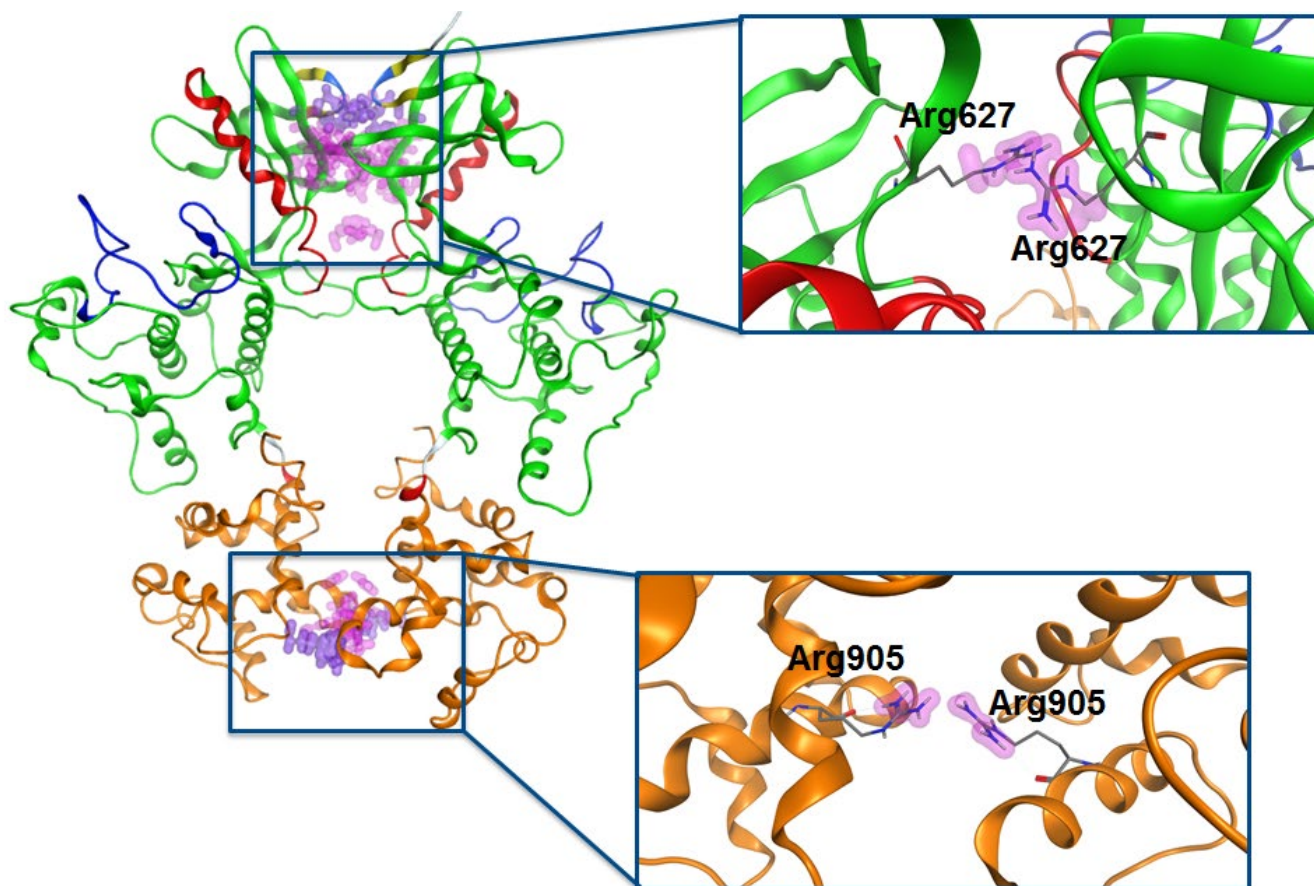

**Figure S3.** Ribbon diagram representing the structure of the KIRA-bound dimer forms obtained by superposition of the monomer of the 4U6R PDB structure on each monomer of the native crystallographic structures of the IRE1 in (A) face-to-face (PDB 3P23) and (B) back-to-back (PDB code: 4YZC) dimers. The kinase domain is shown in green (residues 571-832), the helix- $\alpha$ C in red (residues 603-623), the activation segment in blue (residues: 711-741) and the RNase domain in orange (residues 837-963). Violet spheres = steric clashes.

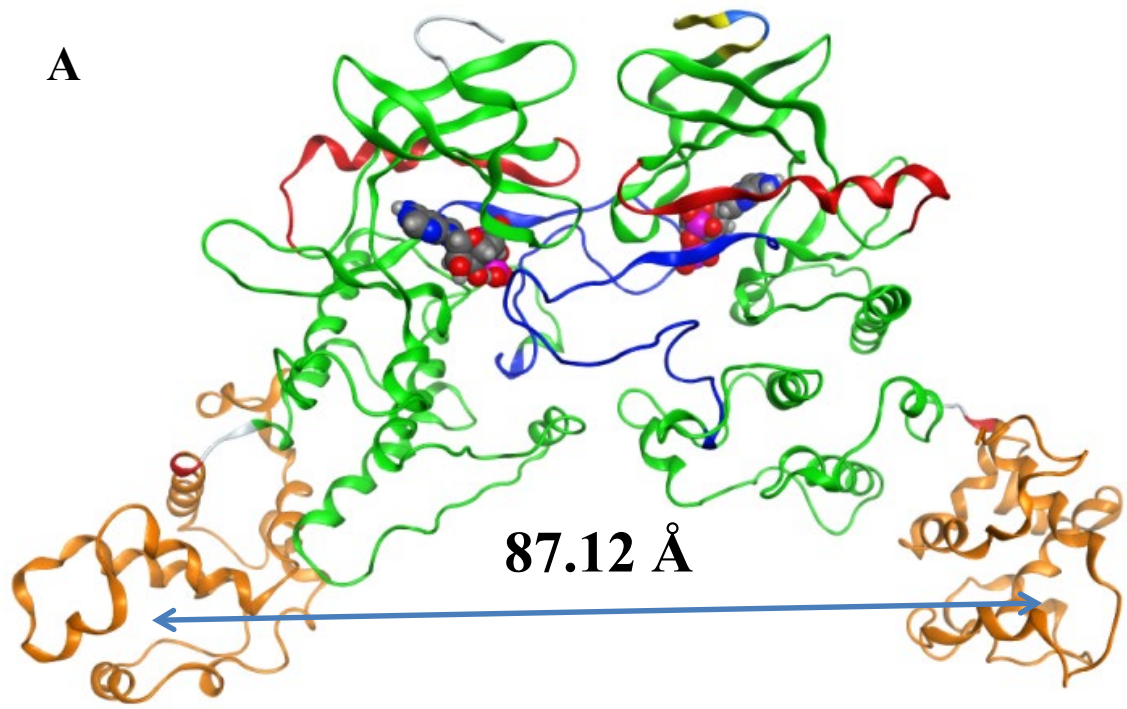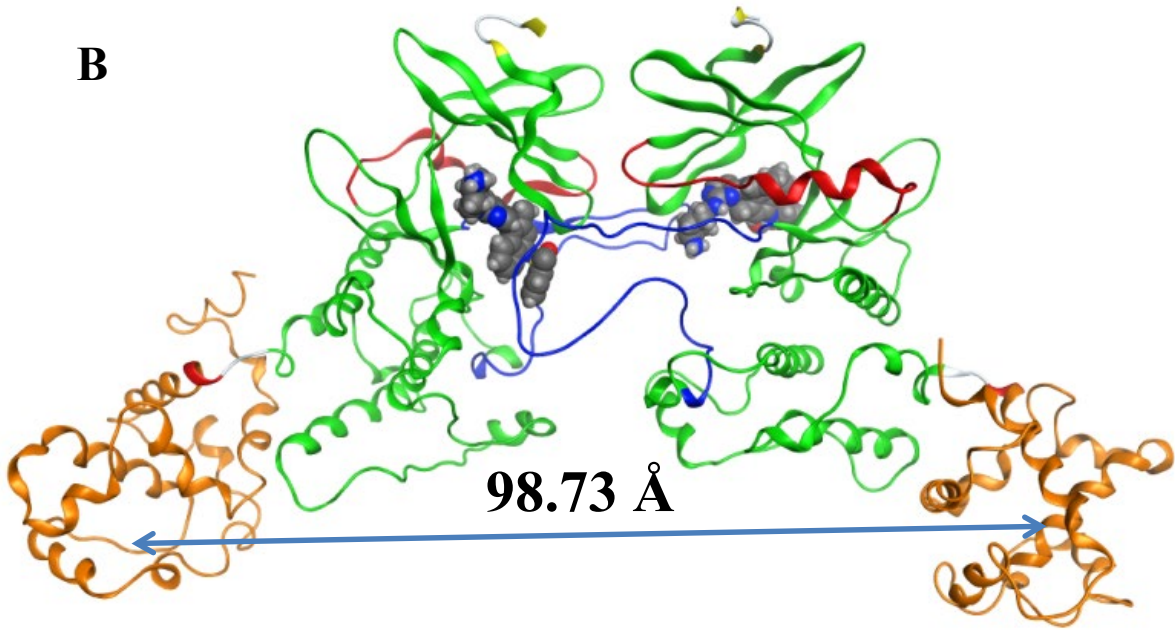

C

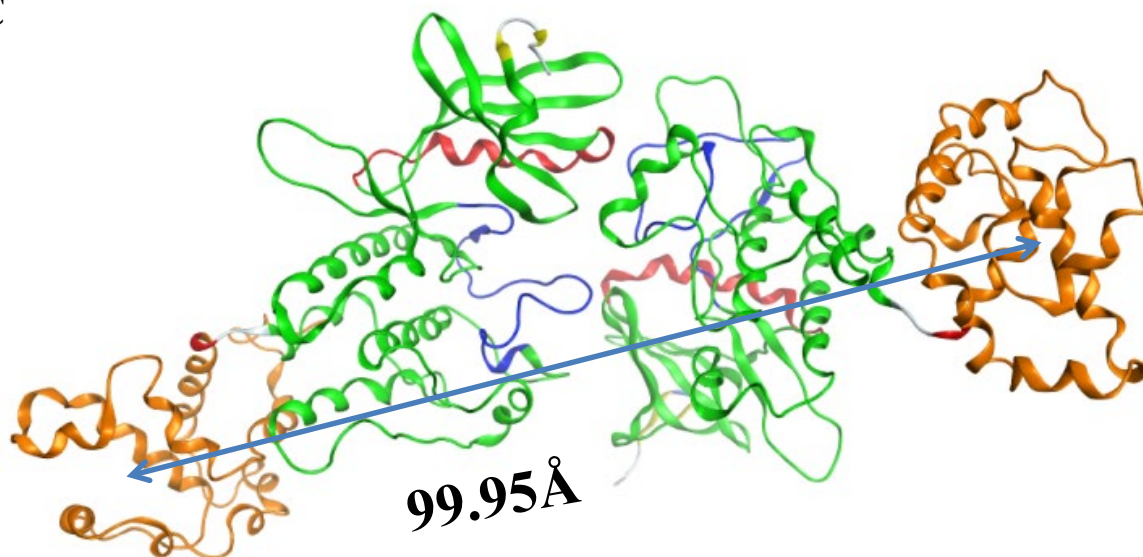

**Figure S4.** Comparison of the (A) native face-to-face crystal dimer structure (PDB code: 3P23) (point 'a' in Panel D of Figure 5), with the higher interface RMSD frame identified from three independent MD replicas for (B) KIRA docked in PDB 3P23 dimer (point 'b' in Panel E of Figure 5) and (C) protein-protein docked pose of PDB 4U6R in face-to-face dimer (point 'c' in Panel F of Figure 5). The distance between the RNase domain Center of Mass (COM) of dimer is shown. The kinase domain is shown in green (residues 571-832), the helix- $\alpha$ C in red (residues 603-623), the activation segment in blue (residues: 711-741) and the RNase domain in orange (residues 837-963). ADP (A) and KIRA (B) highlighted in space-filling model to indicate the kinase binding site.



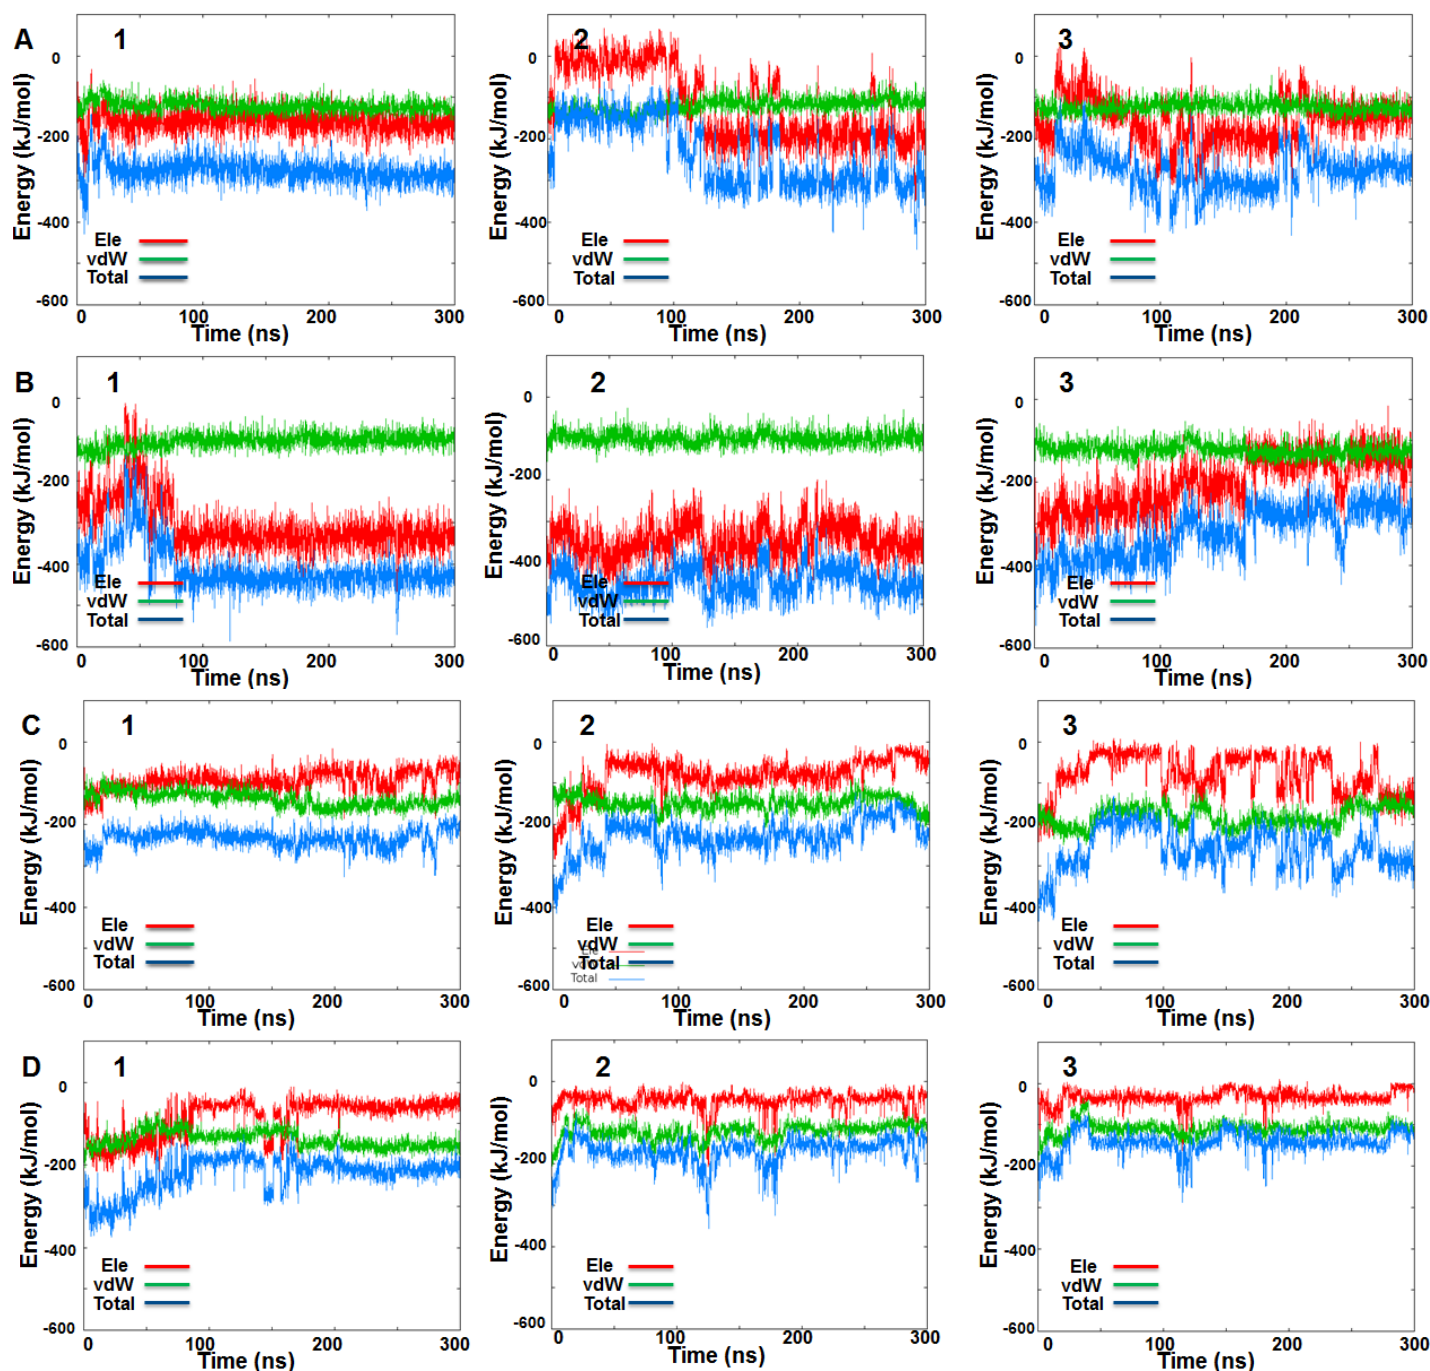

**Figure S5.** IRE1 face-to-face dimer MD simulations. Time-resolved interaction energy profiles for ADP during the three MD simulation replicas of the native face-to-face crystal dimer (PDB code: 3P23): (A) Chain A, (B) Chain B. Time-resolved interaction energy profiles during the three MD simulation replicas for KIRA docked in the native face-to-face crystal dimer (PDB code: 3P23): (C) Chain A and (D) Chain B.

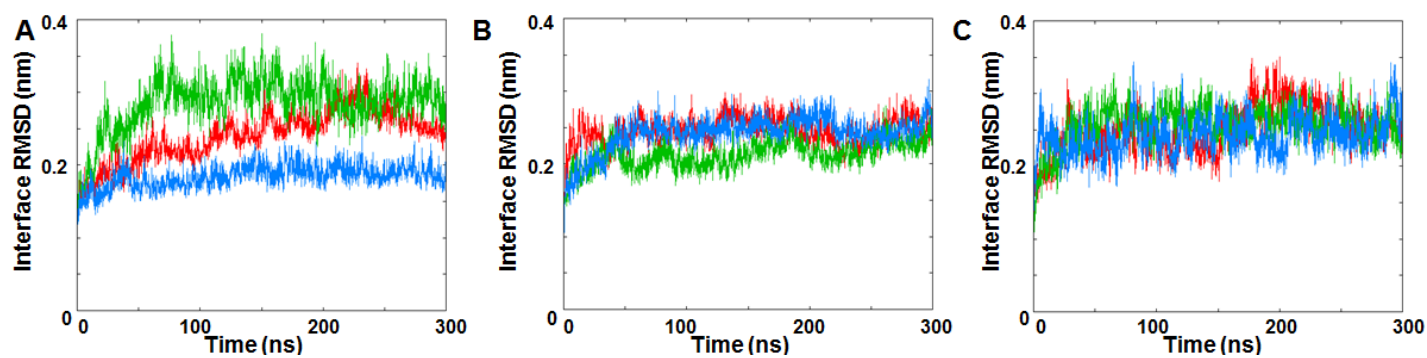

**Figure S6.** Interface RMSDs of IRE1 back-to-back dimer C $\alpha$  atoms during the three MD simulation replicas of (A) native back-to-back crystal dimer structure (PDB code: 4YZC), (B) KIRA docked in PDB 4YZC dimer, and (C) protein-protein docked pose of PDB 4U6R in back-to-back dimer form. Replicates 1, 2, and 3 are represented in red, green and blue, respectively.

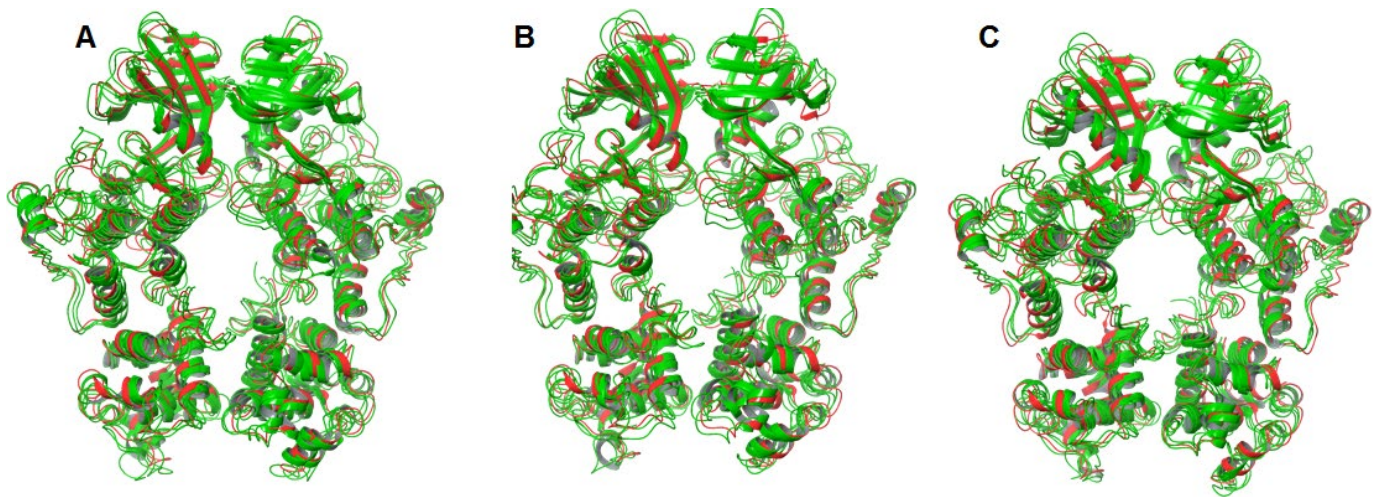

**Figure S7.** Superposition of the last frame of each individual MD simulation (green) of (A) native back-to-back dimer from crystal structure (PDB code: 4YZC), (B) KIRA docked in PDB 4YZC structure and (C) protein-protein docked pose of PDB 4U6R in back-to-back dimer, onto the native back-to-back crystallographic structure (PDB code: 4YZC) (red).

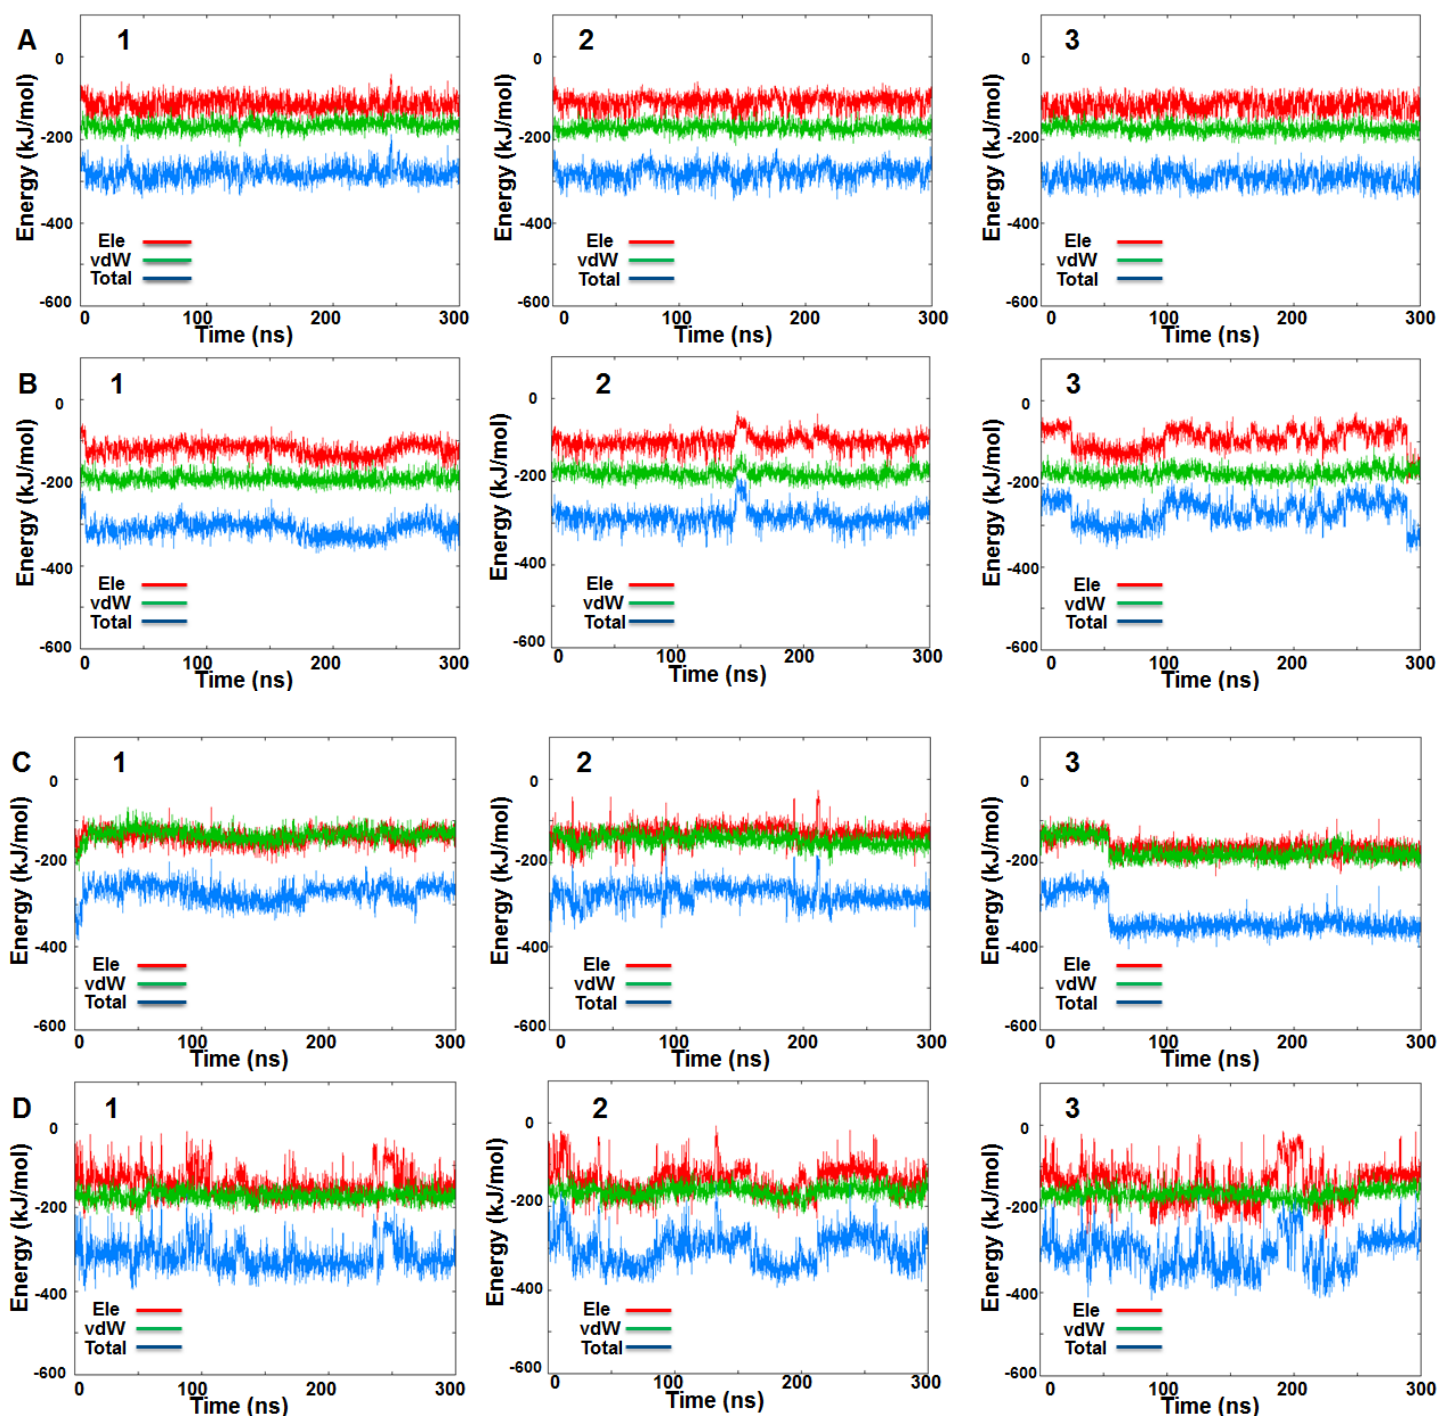

**Figure S8.** IRE1 back-to-back dimer MD simulations. Time-resolved interaction energy profiles for staurosporine during the three MD simulation replicas of the native back-to-back crystal dimer (PDB code: 4YZC): (A) Chain A, (B) Chain B. Time-resolved interaction energy profiles during the

three MD simulation replicas for KIRA docked in the native back-to-back crystal dimer (PDB code: 4YZC): (C) Chain A and (D) Chain B.
